# Supplementary material
Source: PubMed Central journal article supplement (PMC4119274)
Supplement: mmc2.pdf [file mmc2.pdf]

## Article

## The Extracellular $\delta$ -Domain is Essential for the Formation of CD81 Tetraspanin Webs

Yahya Homsy,<sup>1</sup> Jan-Gero Schloetel,<sup>1</sup> Konstanze D. Scheffer,<sup>3</sup> Thomas H. Schmidt,<sup>1</sup> Nicolas Destainville,<sup>2</sup> Luise Florin,<sup>3</sup> and Thorsten Lang<sup>1,\*</sup>

<sup>1</sup>Department of Membrane Biochemistry, Life & Medical Sciences (LIMES) Institute, University of Bonn, Bonn, Germany; <sup>2</sup>Universite Toulouse 3-Paul Sabatier, UPS, Laboratoire de Physique Theorique (IRSAMC), Toulouse, France; and <sup>3</sup>Department of Medical Microbiology and Hygiene, University Medical Centre of the Johannes Gutenberg University, Mainz, Germany

**ABSTRACT** CD81 is a ubiquitously expressed member of the tetraspanin family. It forms large molecular platforms, so-called tetraspanin webs that play physiological roles in a variety of cellular functions and are involved in viral and parasite infections. We have investigated which part of the CD81 molecule is required for the formation of domains in the cell membranes of T-cells and hepatocytes. Surprisingly, we find that large CD81 platforms assemble via the short extracellular  $\delta$ -domain, independent from a strong primary partner binding and from weak interactions mediated by palmitoylation. The  $\delta$ -domain is also essential for the platforms to function during viral entry. We propose that, instead of stable binary interactions, CD81 interactions via the small  $\delta$ -domain, possibly involving a dimerization step, play the key role in organizing CD81 into large tetraspanin webs and controlling its function.

### INTRODUCTION

Tetraspanins constitute a family of small, conserved four transmembrane spanning proteins with 33 members in humans and mice (1). They form extended networks of molecular interactions with other surface molecules called tetraspanin webs or tetraspanin-enriched microdomains (TEMs or TERMS) by means of their strong tendency to associate laterally with one another, with integrins, members of the Ig superfamily and/or signaling receptors (2–5). TEMs play a role in an astonishing diverse range of cellular processes, including cell proliferation, adhesion, spreading and migration, signal-transduction, endocytic trafficking, cell-cell fusion, and host-pathogen interactions (5,6). Due to their involvement in malignancy, the immune system, and infectious diseases, they emerged as potential targets in therapeutic strategies (7).

One of the most studied tetraspanins is CD81 (Cluster of Differentiation 81), also known as 26 kDa cell surface protein or tetraspanin 28. Initially, functions of CD81 were discovered in the immune system including B- and T-cell activation, as target of an antiproliferative antibody (8). Meanwhile other roles in many different cell types have been documented, including brain development (9), retinal pigment epithelium development (10), and fertility (11) (for review see (1,12)).

Apart from its biological functions, CD81 is clinically significant acting as an entry factor for infections with the hepatitis C virus (HCV) (13), the malaria *Plasmodium*

parasite (14), and *Listeria monocytogenes* (15). Moreover, TEMs provide entry and/or exit platforms for human papilloma virus (HPV) and human immunodeficiency virus (16–18) and other pathogens (19,20).

It is still under debate how CD81 or tetraspanins in general form tetraspanin webs. Complexes found in immunoprecipitates after lysing cells with detergents of different strength have led to a hierarchical classification of interactions involved in tetraspanin web formation. Interactions between tetraspanins and their nontetraspanin partners that are resistant to Triton X-100 and digitonin are referred to as primary complexes (7,21). Under these conditions tetraspanin-tetraspanin interactions are disrupted but can be maintained using milder detergents such as Brij 97 or CHAPS. Interactions preserved only under mild solubilization conditions are thought to be weaker, less defined second-level interactions (1,22) that presumably lead to the association of primary complexes forming a large tetraspanin network. Interactions are further stabilized by protein palmitoylation (7,23,24). For instance, palmitoylation of the tetraspanin CD81 promotes its association with the tetraspanin CD9 and one of its major primary binding partners EWI-2 from the Ig superfamily (25,26). Accordingly, a palmitoylation deficient mutant of the tetraspanin CD151 associates less with CD81 and CD82 (27). Still, it is debated what mechanism drives the coalescence of such a variety of different complexes/molecules into large tetraspanin webs (5).

To date, the complete three-dimensional structure has been predicted for only one tetraspanin, CD81 (28). As in all tetraspanins, a small and a large extracellular loop

Submitted November 20, 2013, and accepted for publication May 20, 2014.

\*Correspondence: thorsten.lang@uni-bonn.de

Editor: Anne Kenworthy.

© 2014 by the Biophysical Society  
0006-3495/14/07/0100/14 \$2.00

<http://dx.doi.org/10.1016/j.bpj.2014.05.028>

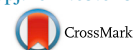

(LEL, further subdivided into the predominantly helical domains  $\alpha$ ,  $\beta$ ,  $\gamma$ ,  $\delta$ , and  $\epsilon$ ) are each flanked by transmembrane regions (TMs), TM1/TM2 and TM3/TM4, respectively. The TMs are closely packed and in continuity of TM3 and TM4 two extracellular antiparallel alpha-helices ( $\alpha$  and  $\epsilon$ ) form the central stalk of the LEL conferring a compact rod-shaped structure to the molecule, with only the short  $\delta$ -domain exposed at the side of the extracellular terminus. The short intracellular segments harbor palmitoylation sites, two at each of the N- and C-terminal tails and two at the linker between TM2 and TM3. The LEL is structurally subdivided into a conserved and a nonconserved section, the so-called constant ( $\alpha$ ,  $\beta$ , and  $\epsilon$ ) and variable region ( $\gamma$  and  $\delta$ ), respectively (28).

Different conformations of the LEL are observed in hexagonal and monoclinic crystals and in solution suggesting that conformational flexibility of this region plays a key role in tetraspanin web assembly and function (29–31). This is in line with the findings that the variable region is crucial for tetraspanin protein-protein interactions and presumably defines the diverse tetraspanin classes (3,32,33).

Here, we have examined how the lateral organization of CD81 in the plasma membrane depends on CD81 protein domains and identified a small part of the variable region, the  $\delta$ -domain, to organize CD81 into tetraspanin platforms, a mechanism supported but in principle independent from primary complexes.

## MATERIALS AND METHODS

### Cloning

From a cDNA library we obtained by polymerase chain reaction (PCR) the sequences for CD81 (NM\_004356.3), EWI-2 (NM\_052868.4), and CD9 (NM\_001769.3), which were subcloned using the pGEM-T easy vector system (catalogue No. A1360, Promega, Madison, WI). All constructs were expressed using the expression vector pEGFP-C1 (catalogue No. 6084-1, clontech, Mountain View, CA) backbone, lacking EGFP. Via fusion PCR, CD81 was fused directly to the N-terminus of monomeric-enhanced GFP (carrying the mutation A207K, which corresponds to A206K described in (34)) with a stop codon and inserted via the *NheI*/*KpnI* sites. Substitution and deletion constructs of CD81 were produced by fusion PCR and inserted using a C-terminal *Kpn2I* restriction site within the CD81 sequence, via the *NheI*/*Kpn2I* sites. In cases the modification was downstream of the *Kpn2I* site, PCR was performed over the entire CD81-mGFP construct and the *NheI*/*KpnI* sites were used. The following constructs were produced according to this procedure. C/A, substitution of the juxtamembrane cysteines by alanines in the positions 6, 9, 80, 89, 227, and 228;  $\Delta\alpha\beta$  lacking aa 115–155;  $\Delta\gamma$ , lacking aa 156–174;  $\Delta\gamma\delta$ , lacking aa 156–190;  $\Delta\delta$ , lacking aa 176–186. Following the same procedure, a CD81-mRFP construct was cloned fusing C-terminally to CD81 mRFP ((35); carrying two silent mutations for introducing a restriction site) with a stop codon.

The C-terminus of EWI-2 or CD9 was fused directly to the N-terminus of a C-terminally myc-tagged mRFP (myc sequence; GAACAAAACCT-TATTTCTGAAGAAGATCTG followed by a stop codon) via PCR and the EWI-2-mRFP-myc or CD9-mRFP-myc sequence was inserted into pEGFP-C1 via the *AgeI*/*KpnI* sites (for EWI-2) or *NheI*/*KpnI* (for CD9).

### Cell culture

Jurkat E6.1 cells and HepG2 cells were cultured essentially as described previously (36). For transfections, 60  $\mu\text{g}$  plasmid (in double transfections 30  $\mu\text{g}$  plasmid of each construct) was added per electroporation cuvette. Electroporation was performed with a Gene pulser Xcell electroporation system (Bio-Rad, Hercules, CA). Jurkat T cells and HepG2 cells were used for experiments 2 days and 1 day after transfection, respectively.

### Antibodies

Mouse monoclonal antibodies were used for human CD81 (catalogue No. 16-0819, eBioscience, San Diego, CA) and GFP (clone 3E6, catalogue No. A11120, Invitrogen, Carlsbad, CA). For staining of pseudovirions (PsVs) we used the polyclonal antibody K75 raised against the L1 protein of the PsVs (16). As secondary antibodies, we used AlexaFluor594-labeled donkey antimouse IgG (H+L) (catalogue No. A21203, Invitrogen), AlexaFluor546-labeled donkey antirabbit IgG (catalogue No. A10040, Invitrogen), or Alexa-Fluor488 donkey antimouse IgG (H+L) (catalogue No. A21202, Invitrogen).

### Epifluorescence microscopy

For imaging, we used an Olympus IX81 microscope equipped with a 60  $\times$  1.49 NA Apochromat objective applying a 1.6 $\times$  magnifying lens (Olympus, Tokyo, Japan) and an EMCCD camera (16  $\times$  16  $\mu\text{m}^2$  pixel size, ImagEM C9100-13, Hamamatsu Photonics, Hamamatsu, Japan) with a 2 $\times$  magnifying lens. For illumination, we used a 488 laser (LAS/488/20, Olympus) or a 150 W Xenon lamp integrated into the MT20E-fluorescence illumination system (Olympus) in combination with the following filter sets: CMR-U-MTIR-488-HC (Olympus) and F36-500 DAPI HC, F36-525 EGFP HC, and F36-503 Tritic HC (AHF Analysentechnik, Tuebingen, Germany). All images are shown applying a linear lookup table at arbitrary scalings.

### Confocal microscopy

For confocal microscopy we used an Olympus FluorView 1000 microscope as described previously (37). Fluorescence recovery after photobleaching measurements were essentially performed and analyzed as described ((37); pixel size was adjusted to 207 nm; for recording the 488 nm laser line and for bleaching the 488 and 405 nm laser lines were used). Otherwise, pixel size was adjusted to 103 nm and DAPI (blue), GFP (green), and Alexa546 (red) were excited at 405, 488, and 543 nm, respectively. Fixed cells were mounted on microscopy slides with 15  $\mu\text{l}$  mounting medium with antifade (catalogue No. P10144, Invitrogen) and cured for 24 h at room temperature (RT). Transfected cells were identified in the green channel, followed by taking at different axial positions optical sections in the blue, green, red, and bright-field channels. For live cell imaging at RT in Ringer solution (130 mM NaCl, 4 mM KCl, 1 mM  $\text{CaCl}_2$ , 1 mM  $\text{MgCl}_2$ , 48 mM D(+)-glucose, 10 mM HEPES, pH 7.4) areas were selected in the bright-field mode, followed by taking a bright-field and fluorescence images.

### Pearson correlation coefficient

The Pearson correlation coefficient (PCC) quantifies the degree of colocalization between two images (38). In principle, its value ranges from 1 (perfect overlap) through 0 (no relation) to  $-1$  (perfectly anticorrelating images). Using the program ImageJ we employed the plugin Align slice (Gabriel Landini, University of Birmingham) for manual alignment of images from different channels allowing corrections of lateral shifts in the  $x$  and  $y$  directions that occasionally occurred during imaging. The PCC was calculated for the aligned images using the plugin Colocalization\_Indices (Kouichi Nakamura, Kyoto University).

## Autocorrelation analysis

An image region defined by a region of interest (ROI) was duplicated yielding the reference image. Using the ImageJ plugin Align slice, the ROI was repeatedly shifted by 1 pixel in one direction subsequently duplicating the respective region. The PCCs between the reference and the duplicates from the shifted images were then calculated using the Colocalization\_Indices plugin and the values (starting with 1) were plotted against the pixel shift. For analysis of stimulated emission depletion (STED) micrographs, we also used the GDSC stack correlation analyzer plugin and always increased Pixel intensity by one to avoid zero values that cannot be processed. For each independent experiment, values from different cell membranes were averaged and a curve was fitted ( $y = 1 - (a \times x)/(b + x)$ ) yielding the 50% decay value. For STED microscopy, correlation was performed on three different ROIs for each membrane sheet; the curves were averaged and fitted using a simple exponential decay function, yielding the 50% decay value for the respective membrane.

## Immunostaining for CD81

Membrane sheets were generated from transfected cells in ice-cold sonication buffer (120 mM potassium glutamate, 20 mM potassium acetate, 10 mM EGTA, 20 mM HEPES, pH 7.2) as described previously (37) and fixed directly with 4% paraformaldehyde (PFA) in phosphate buffered saline (PBS) (137 mM NaCl, 2.7 mM KCl, 8.1 mM Na<sub>2</sub>HPO<sub>4</sub>, pH 7.4) for 30 min at RT. PFA was quenched for 30 min at RT with 50 mM NH<sub>4</sub>Cl in PBS, followed by 3 washes of 10 min with PBS. Membrane sheets were incubated with the first antibody (diluted 1:100 in 3% bovine serum albumin (BSA)-PBS) for 1 h at RT followed by 3 PBS washing steps of 10 min. Incubation with the secondary antibody (AlexaFluor594 labeled donkey anti-mouse diluted 1:200 in 3% BSA-PBS) at RT lasted 1 h for HepG2 membrane sheets and overnight for Jurkat T cell membrane sheets. Afterward, the coverslips were washed 3 times with PBS for 10 min and imaged in PBS containing 1-(4-tri-methyl-ammonium-phenyl)-6-phenyl-1,3,5-hexatriene p-toluene-sulfonate (TMA-DPH, catalogue No. T-204, Invitrogen) for visualization of membranes. In the green channel, exposure times for recording of Jurkat and HepG2 membrane sheets were 100 ms and 1 s, respectively. In the red channel, recording times were 100 and 500 ms for Jurkat and HepG2 membrane sheets, respectively. Background corrected intensities were determined for the green and red channels of individual membrane sheets using ImageJ. The PCC between the images from the red and the green channels was determined as described previously. Corrections for lateral shifts were performed manually using the Align slice plugin referring to at least 4 to 5 different structures apparent in both channels or to 100 nm Tetraspeck beads (TetraSpeck Microspheres, catalogue No. T-7279, Invitrogen) for Jurkat and HepG2 membrane sheets, respectively.

## STED microscopy sample preparation and imaging

Membrane sheets were generated from HepG2 cells transfected and fixed as described previously. After quenching for 20–30 min with 50 mM NH<sub>4</sub>Cl in PBS, membranes were washed three times with PBS and blocked for 1 h at RT in 3% BSA-PBS. Membranes were then incubated with anti-GFP antibody, diluted 1:100 in 1% BSA-PBS overnight at 4°C. After 4 washes with PBS, incubation with the secondary antibody (Alexa488 labeled-donkey antimouse), diluted 1:100 in 1% BSA-PBS, was performed for 2 h at RT. After 3 washes with PBS, coverslips were mounted on microscopy slides and embedded as described for confocal microscopy samples. Samples were sealed with clear nail polish and stored at 4°C.

For imaging, we used a TCS-SP8 gated-STED microscope (Leica, Mannheim, Germany) at the Light Microscopy Facility (LMF) at the German Centre for Neurodegenerative Diseases (DZNE) in Bonn. First,

confocal images were taken into the red channel to detect EWI-2-RFP and into the green channel to measure CD81-GFP intensity. STED images were recorded at 200 Hz, 40% STED beam intensity, gating between 1 and 6.5 ns and Pixel sizes were close to 20 nm. Analyzed STED micrographs were composed of 6 averaged frames.

## Coclustering assay

From cotransfected cells, expressing either CD81-RFP and CD81-GFP or a GFP-labeled CD81 variant, EWI-2-RFP or CD9-RFP and GFP-labeled CD81 or CD81 variants membrane sheets were generated, fixed, quenched, and washed as described previously. Imaging was performed in PBS containing TMA-DPH, after adding 100 nm Tetraspeck beads for the correction of lateral shifts that occasionally occurred between filter changes. Green, red (which tended to yield less clustered patterns), and blue channels were recorded in the epifluorescence mode of the microscope. Images were analyzed using the program ImageJ. First, an image stack including all three channels was created and, if necessary, corrected for lateral shifts (referring to Tetraspeck beads) using the Align Slice plugin of ImageJ. A ROI was then placed on the basal membrane for generating duplicates from the green and red channels, which were used for calculating the PCC using the Colocalization Indices plugin of ImageJ. In experiments involving EWI-2-RFP, we also performed autocorrelation analysis on the green channel.

## Total internal reflection fluorescence (TIRF) microscopy

Jurkat cells were cultured in suspension for 2 days after transfection and harvested through 3 min of centrifugation at 1000 rpm in an Eppendorf (Hamburg, Germany) centrifuge 5810. The cell pellet was resuspended in Ringer solution and aliquots were plated into 6-well plates at a concentration of  $\sim 1.5 \times 10^6$  cells/well, containing poly-L-lysine coated glass coverslips with a diameter of 25 mm. Cells adhered in the cell incubator for 20 min and were imaged within the following 20 min. Imaging was performed in the TIRF mode of the microscope, which selectively excites fluorescence in a thin layer spanning only a few 100 nm at the glass-water interface, including the basal membrane of the adhered cells. Movies were recorded at 2 Hz for  $\sim 15$  s. Images were analyzed using the program ImageJ, calculating the PCC between two successive frames separated by a time interval of 0.5 s. Values obtained from one movie were averaged. For each independent experiment the values obtained from all movies were averaged.

## Pseudovirion-induced endocytosis

Jurkat cells were transfected with either CD81-GFP or CD81- $\Delta\delta$ -GFP and cultured for 2 days in suspension.  $10^6$  cells were pelleted for 3 min at 1000 rpm in an Eppendorf centrifuge 5810, resuspended in 5 ml prewarmed medium, and transferred into a 25 cm<sup>2</sup> flask. Sulforhodamine101 (catalogue No. s7635, Sigma-Aldrich, St. Louis, MO) was added to a final concentration of 20  $\mu$ M and, where required, 2  $\mu$ l of PsVs were added (corresponding to 0.42  $\mu$ g total protein or 0.2  $\mu$ g of the major capsid protein L1 of HPV; PsVs were prepared as previously described (39)). The mixture was incubated for 10 min in the cell incubator with gentle agitation from time to time to avoid cell sedimentation. Cells were then centrifuged for 3 min at 800 rpm (using an Allegra X-15R centrifuge from Beckman Coulter, Brea, CA), the pellet was resuspended in 1 ml prewarmed Ringer solution and 0.5 ml aliquots each were directly plated onto poly-L-lysine coated glass coverslips. The cells were adhered for 20 min in the cell incubator and directly fixed for 30 min with 4% PFA in PBS after membrane sheet generation. To correct for potential lateral shifts that occur occasionally during imaging, the samples were supplemented with 100 nm Tetraspeck

beads which can be observed in all channels. Images were then recorded using epifluorescence microscopy in the green, red, and blue channels visualizing the CD81/CD81- $\Delta\delta$  distribution, endosomes or the plasma membrane, respectively. For analysis, we manually determined the number of endosomes (as visualized by the fluid phase marker in the red channel) per membrane sheet colocalizing with a CD81/CD81- $\Delta\delta$  cluster in the green channel.

In a second set of experiments,  $5 \cdot 10^5$  transfected cells were incubated in the absence of Sulforhodamine in 1 ml prewarmed medium adding 5  $\mu$ l of PsVs. The suspension was incubated for 1 h at 37°C in a rotating Eppendorf tube. Cells were adhered and fixed as previously mentioned before they were permeabilized for 2 min in 0.2% Triton X-100 in PBS. After a PBS wash, cells were blocked for 30 min with 1% BSA-PBS. Incubation with the first antibody K75, diluted 1:1000 in 1% BSA-PBS, was then performed for 1 h at 37°C. After one wash in PBS and another wash in 1% BSA-PBS, the secondary antibody was applied (Alexa546 donkey anti-rabbit IgG, diluted 1:300) in 1% BSA-PBS containing Hoechst dye (diluted 1:10,000) for 1 h at 37°C. After two washes in PBS, cells were embedded for confocal microscopy as described above.

## RESULTS

To investigate CD81 membrane organization, we used unroofed cells (i.e., plasma membrane sheets). For this detergent-free preparation, a 100 ms ultrasound pulse generates essentially pure basal plasma membranes through mechanical shearing forces (40). Because the membranes remain attached to the glass coverslip, they constitute flat objects on which the distribution of plasmalemmal components can be imaged by epifluorescence microscopy with high sensitivity. Previous work showed that the morphology of the inner membrane leaflet is retained on immediately fixed membrane sheets (41) and that diffusion of a membrane protein in freshly prepared membranes is the same as in intact cells (42). This suggests that plasma membrane sheets are a suitable and convenient preparation for studying selectively proteins expressed on the cell surface.

First, we examined how the distribution of CD81 in the cell membrane depends on its concentration. We expressed GFP-labeled CD81 (for C-terminal tagging of CD81 by GFP see also (43)) in cells endogenously lacking (HepG2 cells) or expressing CD81 (Jurkat T cells). Membrane sheets were fixed immediately and also immunostained for CD81. In the green channel, we recorded overexpressed CD81-GFP and in the red channel immunostaining of overexpressed CD81 and, in the case of Jurkat T cells, also endogenous CD81. Over the entire concentration range CD81 was concentrated in spotty structures, though the cluster pattern was potentially not completely resolved due to diffraction-limited imaging. Moreover, as shown in Fig. S1, in the Supporting Material: i), HepG2 cells lack, as expected, endogenous CD81; ii), in Jurkat T cells overexpression in most membranes hardly doubled total CD81; and iii), overexpressed and endogenous CD81 do not form distinct patterns.

For a more detailed analysis we turned to superresolution light microscopy on HepG2 cells, in which the clustering of expressed CD81 can be studied in the absence of endoge-

nous CD81. At lower concentrations up to densities of 40 clusters per  $\mu\text{m}^2$ , cluster density was linearly related to CD81 concentration:  $\sim$ twofold more clusters formed upon doubling the concentration (see inset in Fig. 1 C). Upon a further increase in CD81, cluster density rose less, almost certainly because individual clusters can no longer be resolved properly (even at superresolution) and their number is underestimated (Fig. 1; see membrane sheets #3 and #4 at STED microscopy resolution). From this data, we conclude that more CD81 molecules primarily form more clusters rather than increasing their size or causing a more uniform distribution of molecules.

Next, we aimed for identifying the CD81 protein domain(s) or feature(s) necessary for targeting the molecule into CD81 microdomains. In Jurkat T cells, we overexpressed CD81-RFP together with CD81-GFP or GFP-fused to a CD81 variant and analyzed whether the red and green constructs are enriched in the same domains (Fig. 2). For quantification of the similarity between the green and the red channels we calculated the PCC, which is independent from offsets and absolute intensities in the two channels, weighting the departure from the mean (38).

As suggested by a high PCC (on average 0.6; Fig. S2), CD81-RFP and CD81-GFP were located in the same domains, indicating that the targeting mechanism did not discriminate between the differently labeled constructs (Fig. 2 A). When all six palmitoylation sites were replaced by alanines, coenrichment decreased only slightly (Fig. 2 C), suggesting that palmitoylation plays some yet not the major role. We then deleted almost half of the LEL, including the  $\alpha$ - and  $\beta$ -helical domains, expected to have a strong impact on the structural orientation of the remaining helices (see Fig. S3 for illustration). However, despite such dramatic modification of the molecule it was still capable of forming CD81 domains (Fig. 2 C), indicating that the previously described dimerization via the  $\alpha\beta$ -interface (29,30,44) is not a prerequisite for domain targeting. The variable region within the LEL plays the major role in specific interactions. In fact, deletion of the variable region and its two flanking cysteines (aa 156–190; (12,29); also see Fig. S3 for illustration of the deleted domains) strongly decreased domain targeting (Fig. 2 C). The variable region contains two alpha-helical domains separated by a disulfide bridge, referred to as  $\gamma$ -domain (158–174, not including the flanking cysteines) and  $\delta$ -domain (176–189) (29). A construct lacking the  $\gamma$ -domain ( $\Delta$ 156–174) essentially behaved like wild-type CD81, whereas deletion of the  $\delta$ -domain ( $\Delta$ 176–186) diminished domain targeting to a level indistinguishably from that seen for the construct lacking the entire variable region (Fig. 2, B and C). This effect was not caused by incomparable cell surface expression levels of CD81-GFP and CD81- $\Delta\delta$ -GFP (Fig. S4), and we also verified by confocal microscopy that CD81- $\Delta\delta$ -GFP was not retained more strongly in intracellular structures (Fig. S5). As an alternative approach to validate the result



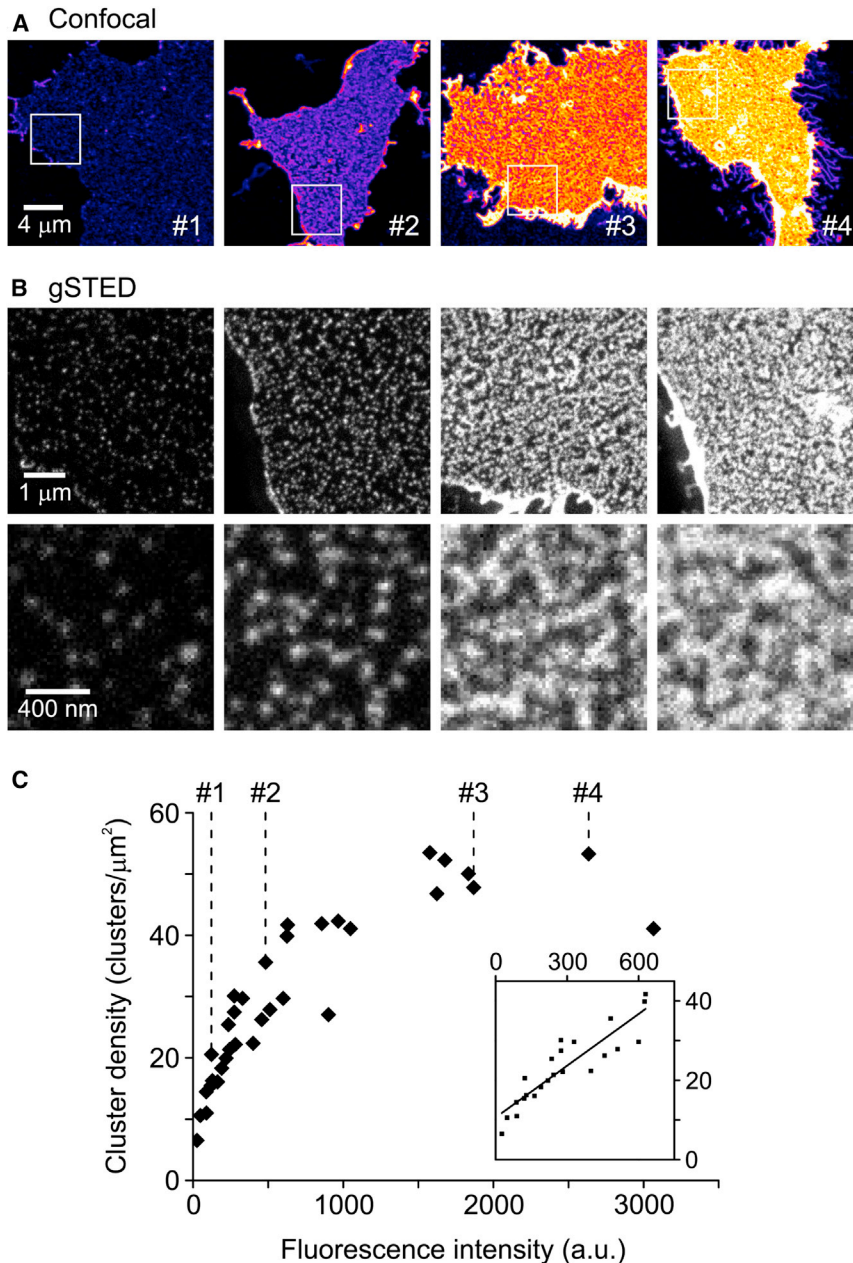

**FIGURE 1** Elevation of CD81 levels generates more clusters. CD81-GFP was expressed in HepG2 cells and for gated STED imaging of membrane sheets, and the signal was enhanced by immunostaining for GFP. (A) Confocal micrographs (to minimize bleaching) for quantification of CD81 expression levels. Shown are four membrane sheets (see labels #1 to #4) from cells with varying CD81 expression levels applying the fire lookup table at the same scaling. Immunostaining intensity was quantified and taken as readout for relative CD81 concentration. (B) Upper panel, sections from larger STED micrographs, corresponding to the white squares in A. On each original STED micrograph three ROIs (one shown in the lower panel) were selected for manual cluster counting; averaging all three values yielded the cluster density obtained from the respective membrane sheet. Images are shown at the same scaling. (C) Cluster density plotted against CD81 concentration. Labels #1 to #4 mark intensity values obtained for the respective membrane sheets shown in (A). The inset illustrates the linear relationship between cluster density and CD81 concentration in the lower concentration range. Membrane sheets were collected from three independent experiments (8–13 membrane sheets per experiment). To see this figure in color, go online.

from our microscopic assay, we performed immunoprecipitation experiments after cell solubilization with CHAPS. CD81-GFP pulled down endogenous CD81, as expected, whereas CD81- $\Delta\delta$ -GFP was less efficient (Fig. S6). This indicates that CD81- $\Delta\delta$ -GFP and CD81 are still interacting, presumably via their  $\alpha/\beta$ -domains, albeit in steady state the number of complexes is reduced as CD81- $\Delta\delta$ -GFP is less enriched in CD81 microdomains (Fig. 2) due to diminished binding either to other CD81 molecules (forming dimers by a mechanism that in this case would be independent from the described  $\alpha/\beta$ -interface dimerization) or to other TEM components. Alternatively, the capability to form dimers is reduced and dimer formation is a prerequisite for TEM targeting.

The  $\delta$ -domain-dependent CD81 targeting was also observed in HepG2 cells (Fig. S7). Furthermore, CD81- $\Delta\delta$  was not uniformly distributed but formed separate clusters in both cell types. From these data we conclude that correct targeting of CD81 into CD81 domains requires the  $\delta$ -domain, whereas other regions of the LEL and palmitoylation play a less prominent role, at least when analyzing the static distribution of molecules in the membrane.

Large tetraspanin webs or TEMs are circular in shape and relatively stable in position (45,46). In case CD81 domains represent large tetraspanin webs or TEMs, they should be less dynamic than putative non-TEM domains formed by CD81- $\Delta\delta$ . For clarification, we performed fluorescence recovery after photobleaching measurements in

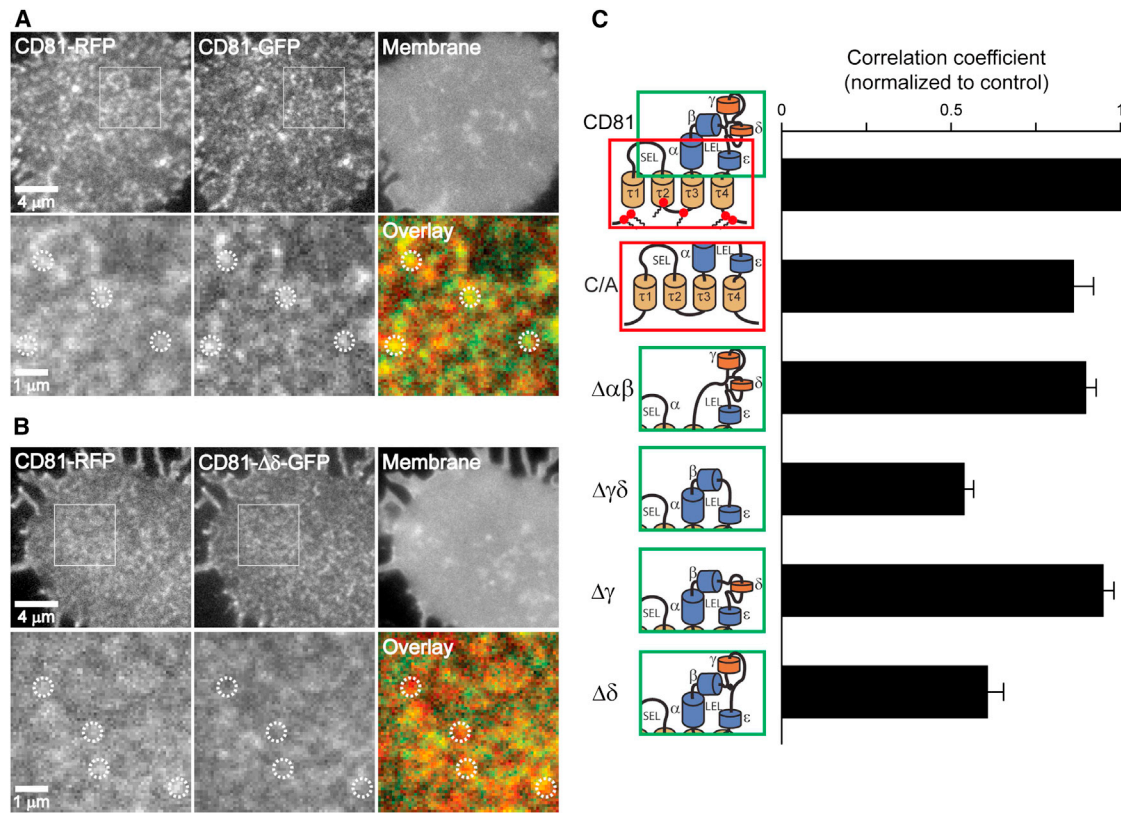

**FIGURE 2** The  $\delta$ -domain of the LEL is required for targeting of the CD81 molecule into CD81-enriched domains. Membrane sheets from Jurkat T cells co-overexpressing CD81-RFP along with CD81-GFP (A) or CD81- $\Delta\delta$ -GFP (B). Images were recorded in the red (RFP), green (GFP), and blue (TMA-DPH, a general membrane stain) channels. RFP- and GFP-labeled CD81 are enriched in the same domains, whereas deletion of the  $\delta$ -domain strongly decreases the overlap between full length CD81-RFP and CD81- $\Delta\delta$ -GFP (for comparison see *dotted circles* marking identical locations). (C) PCC between CD81-RFP and CD81-GFP or a GFP-labeled CD81 variant. Pictograms show the respective GFP-labeled constructs whose lateral distribution was compared to CD81-RFP; please note that the pictograms are schemes not reflecting the real size and orientation of the domains; for the relation between the pictogram and the predicted 3D structure see Fig. S3, which also illustrates the size of the deleted molecule portions on a realistic scale. From top: CD81; C/A, with all cysteine palmitoylation sites substituted by alanines;  $\Delta\alpha\beta$ ,  $\Delta\gamma\delta$ ,  $\Delta\gamma$ , and  $\Delta\delta$ , deletion of the respective domains of the LEL (*large extracellular loop*). SEL, small extracellular loop; red solid circles with acyl chains indicate cysteine palmitoylation sites.  $\tau 1$ – $\tau 4$  indicate transmembrane regions. Values are given as means  $\pm$  SE ( $n = 3$ – $10$  independent experiments; for each experiment values from 5 to 22 membrane sheets were averaged and normalized to control (CD81-GFP)). To see this figure in color, go online.

living cells (Fig. S8). For CD81, we determined an apparent lateral diffusion coefficient of  $0.03 \mu\text{m}^2/\text{s}$ . Compared to previously published values in polarized and nonpolarized HepG2 cells, in which  $0.07$  and  $0.11 \mu\text{m}^2/\text{s}$  have been determined (47), respectively, the lower value is expected as in Jurkat T cells CD81 forms larger clusters (see below). Consistent with this view, we find a strongly increased diffusion coefficient of CD81- $\Delta\delta$  (Fig. S8). To study the stability of the domains we further examined CD81 and CD81- $\Delta\delta$  cluster dynamics using TIRF microscopy. As shown in Fig. 3, most CD81 clusters were stable over seconds, whereas CD81- $\Delta\delta$  clusters translocated and/or disassembled. When the entire variable region was deleted, dynamics of platforms did not increase further, and deletion of the  $\gamma$ -domain alone showed a cluster pattern comparable to wild-type CD81 (see Fig. 3 E). The  $\delta$ -domain-dependent effect on stability correlates well with the results from targeting analysis, suggesting that CD81 is organized in

larger and stable molecular platforms only in the presence of the  $\delta$ -domain.

The primary binding partner EWI-2 forms stable Triton X-100 resistant complexes with CD81 (25,48) via interactions involving from EWI-2 the short cytoplasmic tail and the glycine-zipper motif in the TM, and from CD81 the TM3 and TM4, with some contributions of the extracellular domains (49). To clarify whether CD81 and CD81- $\Delta\delta$  clusters differ in their capability to incorporate primary binding partners, we elevated the concentration of EWI-2. As shown in Fig. 4, in Jurkat T cells EWI-2 and CD81 coenriched in the same domains, indicating the formation of primary complexes (Fig. 4, A and C). As for domain targeting of CD81 (Fig. 2) and domain dynamics (Fig. 3), also for the coenrichment of CD81 and EWI-2 only the  $\delta$ -domain was required (Fig. 4 C).

Next, we tested association of CD81 with another tetraspanin, CD9. Compared to CD81, overlap with CD9 was

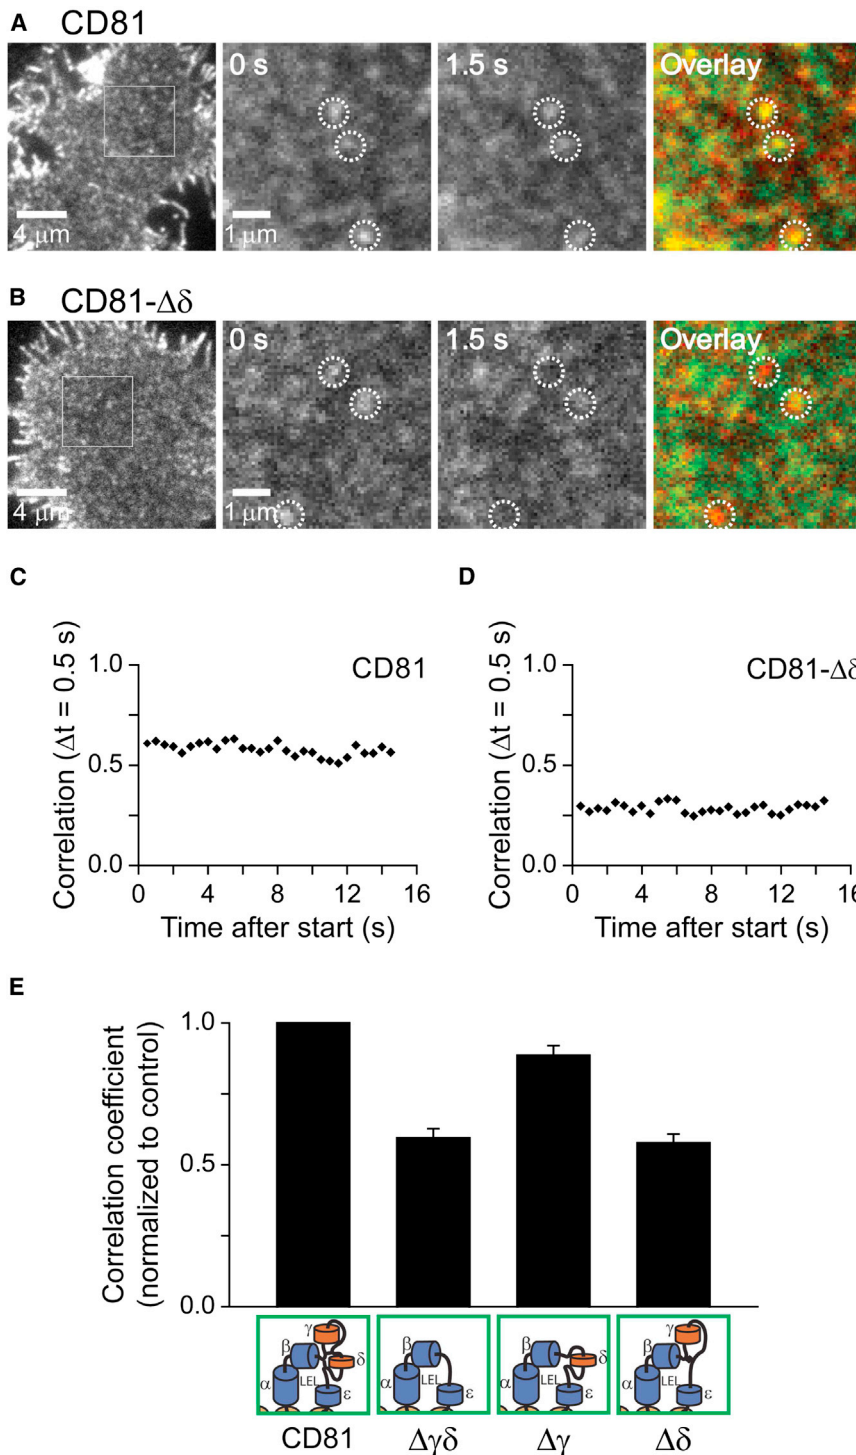

**FIGURE 3** Dynamics of CD81 and CD81 lacking the  $\gamma$ - and/or  $\delta$ -domain. Live Jurkat cells expressing (A) GFP-labeled CD81 or (B) CD81- $\Delta\delta$  imaged at 2 Hz in Ringer solution at RT using total internal reflection fluorescence microscopy. From left to right, overview, magnified views from two recordings separated by 1.5 s and overlay. Yellow color indicates areas in which the distribution pattern remains unchanged. In contrast to CD81- $\Delta\delta$ , CD81 domains regularly remain largely unchanged between two or more frames. Dotted circles indicate identical regions. (C and D) CD81 and CD81- $\Delta\delta$ , for comparative illustration of the lateral dynamics, over the entire movie the PCC between two successive images was determined, essentially representing repetitive measurements between two successive frames over time. The individual PCC values were then plotted against the time the second image of the correlated pair of images was recorded (plots are derived from the cells shown in A and B). (E) Averaged traces from cells expressing GFP-labeled CD81, CD81- $\Delta\gamma\delta$ , CD81- $\Delta\gamma$ , and CD81- $\Delta\delta$  were generated and the average PCC over all time points was calculated. For one experiment and condition 5–8 cells were averaged and normalized to control. Values are given as means  $\pm$  SE ( $n = 4$ ). To see this figure in color, go online.

diminished (0.35; Fig. S2) but also dependent on the presence of the  $\delta$ -domain (Fig. 5). Considering that the overlap between CD81 and EWI-2 (0.53; Fig. S2) was higher than that between CD81 and CD9, the strength of interactions found by immunoprecipitation after cell lysis (primary and secondary interactions, see above) is reflected in the degree of overlap found in the microscopic assay.

EWI-2 also increased the platform size strongly (Fig. 4, D and E), an effect that was not dependent on palmitoylation of CD81 (Fig. 4 D). Although a diameter of 560 nm for CD81 domains (Fig. 4 E; correction for the blurring effect would reduce this value only by  $\sim 10\%$ ) is clearly above the resolution limit, the size of CD81- $\Delta\delta$  clusters is possibly limited by diffraction and may represent an upper estimate. However,



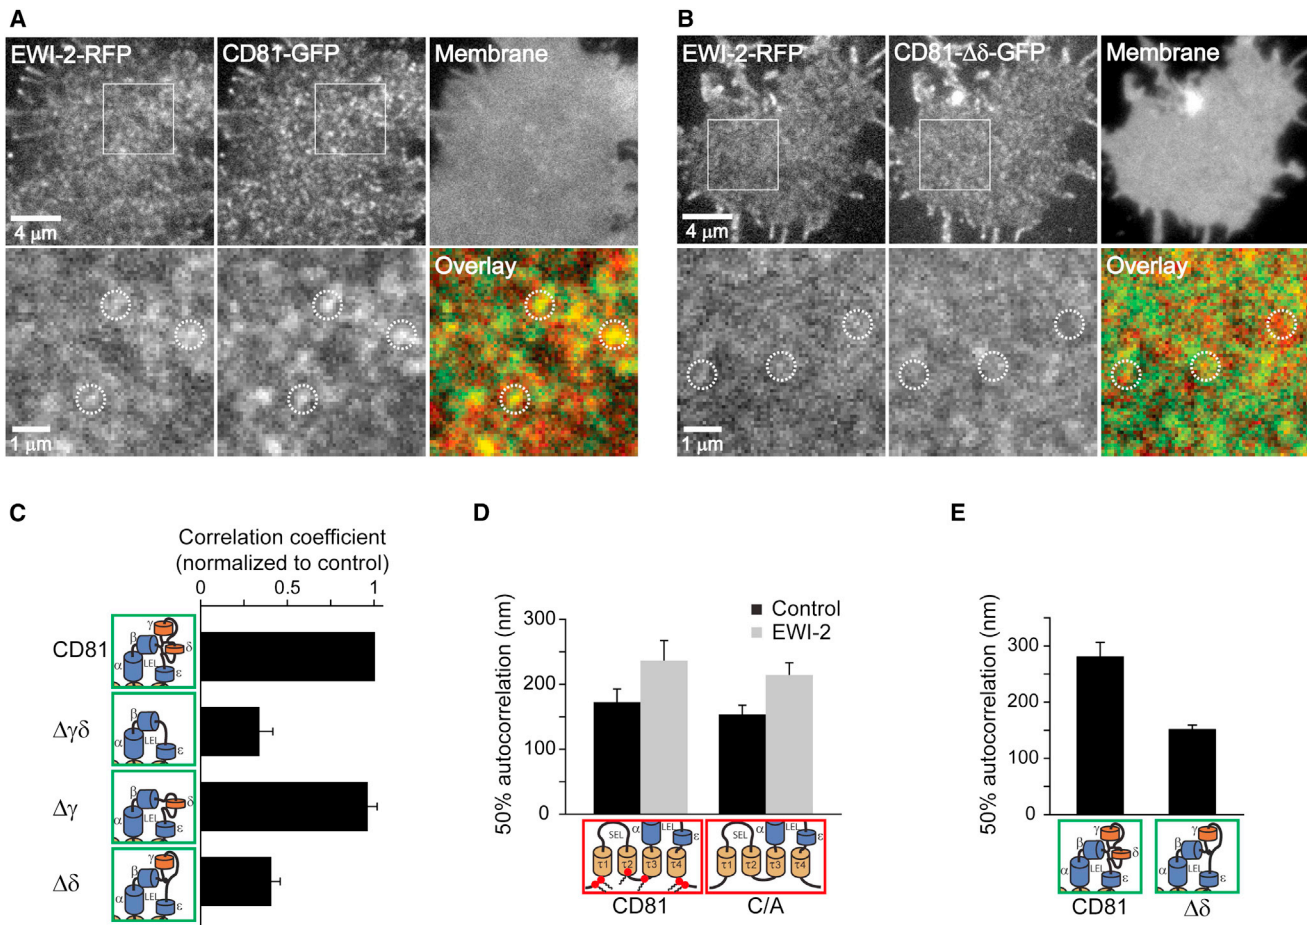

**FIGURE 4** For large TEMs the  $\delta$ -domain is required. (*A* and *B*) Membrane sheets from Jurkat cells co-overexpressing the CD81 interaction partner EWI-2 (RFP-labeled) together with GFP-labeled CD81 (*A*) or CD81- $\Delta\delta$  (*B*). Lower panels show magnified views and overlays from the marked regions in the upper panels. Upon overexpression of CD81- $\Delta\delta$ -GFP, the EWI-2-RFP signal tended to show a less clustered pattern. Dotted circles indicate identical pixel locations. (*C*) Strong overlap between EWI-2 and the clusters in the green channel required the CD81  $\delta$ -domain. Overlap was quantified by the PCC. Values are given as means  $\pm$  SE ( $n = 3$ –5 independent experiments and for each experiment values from 5 to 20 membrane sheets were averaged and normalized to the respective control). (*D*) Cells expressing CD81-GFP or CD81-C/A-GFP without (*black bars*) or with (*gray bars*) cotransfected EWI-2-RFP. Autocorrelation analysis (see Fig. S9 for method evaluation) of the green channel shows that EWI-2 increases the size of both CD81 and the palmitoylation deficient mutant. Values are given as means  $\pm$  SE ( $n = 3$  independent experiments and for each experiment values from 7 to 8 membrane sheets were averaged). (*E*) Coexpression of EWI-2-RFP and CD81-GFP or CD81- $\Delta\delta$ -GFP. CD81 forms about threefold larger domains (referring to area and assuming circular shape) when compared to CD81- $\Delta\delta$  domains. Values are given as means  $\pm$  SE ( $n = 3$  independent experiments and for each experiment values from 7 to 11 membrane sheets were averaged). Please note that the condition CD81-GFP/EWI-2-RFP was performed in *D* as well as in *E*, yielding a smaller effect in *D*, which we explain that here we had 38% of very low EWI-2 expressing cells compared to 22% in *E*. To see this figure in color, go online.

we can safely conclude that EWI-2 increases the cluster area size at least by a factor of 3 (Fig. 4 *E*). In contrast, CD81- $\Delta\delta$  clusters overlapped less with EWI-2 and remained close to diffraction-limited size (Fig. 4 *E*). These findings show that CD81 and EWI-2 interact with each other and that, as a consequence, the increase in primary complexes leads to larger tetraspanin platforms. This is in line with a recent report showing that EWI-2wint (EWI-2 without its N-terminus, a slightly shorter cleavage product from EWI-2 (50)) decreases CD81 mobility in the cell membrane and increases the fraction of confined molecules (51). The observation that CD81- $\Delta\delta$  clusters failed to incorporate EWI-2 might be explained by the putatively diminished stabilizing effect of the large extracellular loop on the interaction with EWI-2,

though interactions still should be mediated via the TMs of both CD81 and EWI-2 (49). In contrast to Jurkat T cells, elevation of EWI-2 in HepG2 cells did not produce larger CD81 domains (Fig. S10). This suggests that an increase of primary complexes promotes platform growth (in Jurkat T cells) but per se is not sufficient for the coalescence of primary complexes into webs.

CD81 acts as a coreceptor during the entry of a variety of pathogens into different cell types. Hence, we tested whether the function of the  $\delta$ -domain, or in other words the formation of large CD81 platforms, is also relevant for pathogen induced endocytosis. Using pseudovirions (PsVs) from HPV type 16, it has been shown that TEMs are involved in HPV endocytosis and infection (16,52)



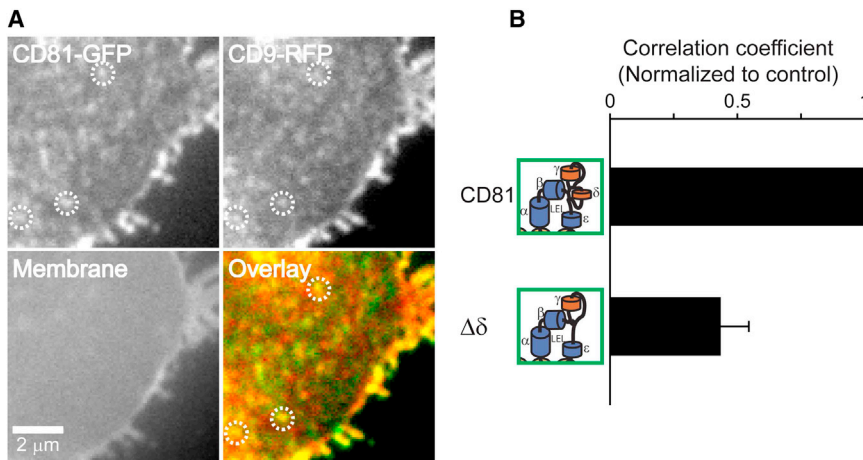

**FIGURE 5** Colocalization of CD81 and CD9. (A) Membrane sheet from a Jurkat T cells co-over-expressing CD81-GFP and CD9-RFP. The upper panel shows the fluorescent protein-tagged constructs, the lower panel a TMA-DPH membrane staining and an overlay. (B) Overlap was analyzed as described in Fig. 2. Values are given as means  $\pm$  SE ( $n = 3$  independent experiments; for each experiment values from 13 to 20 membrane sheets were averaged and the mean of CD81- $\Delta\delta$  was normalized to control). To see this figure in color, go online.

and we tested whether our CD81-GFP platforms are also capable of mediating PsV uptake. As shown in Fig. 6, PsVs readily triggered the formation of membrane sheet-associated endosomes that overlap with CD81 platforms, whereas in the absence of the  $\delta$ -domain hardly any PsV-triggered endocytosis was detected. At sites of endocytosis, we frequently observed patching of CD81, but not of CD81- $\Delta\delta$ . Such CD81 accumulation sites, overlapping with immunostained PsV particles, were also observed on intact cells with confocal microscopy (Fig. S11). These observations are similar to a recent study showing that a hepatitis C viral particle engaged CD81-GFP before internalization (53).

This indicates that CD81- $\Delta\delta$  clusters are incapable of acting as sites at which endocytosis of PsV is triggered and that the  $\delta$ -domain is essential for CD81 integration into platforms functioning in pathogen entry.

## DISCUSSION

### CD81-enriched membrane domains

Our data show that over a wide concentration range CD81 is enriched in domains. Though we cannot exclude that some CD81-enriched domains contain exclusively CD81 or CD81 together with non-TEM components, several arguments indicate that in particular the large molecular CD81 platforms represent bona fide TEMs. First, the primary partner EWI-2 is recruited into the CD81 domains increasing their size. Second, the tetraspanin CD9, known to be coenriched with CD81 in TEMs, also overlaps with CD81 domains. Third, CD81 domains are platforms at which PsV-triggered endocytosis occurs. Fourth, the lateral mobility of CD81 domains is much lower when compared to non-TEM CD81- $\Delta\delta$  clusters that do not overlap with EWI-2.

All these findings have been obtained with fluorescent protein-labeled CD81 and are in line with data from previous reports on immunoprecipitation experiments, indirectly indicating that fluorescent protein tagging does not seriously alter the behavior of CD81. This view is also supported by

our immunoprecipitation experiment verifying that CD81-GFP still binds to endogenous CD81. In addition, we find CD81-GFP to be coenriched with endogenous CD81 (for earlier reports using FP tagged CD81 also see (43,53)).

### Role of CD81 TEMs in pathogen entry and targeting strategies

A number of studies have documented that the CD81 molecule plays a key role as an entry factor for pathogens (19,20). The mechanisms apparently vary as in the case of HCV, it is questionable whether association of CD81 with TEMs is truly essential for the early steps of HCV entry (51,54), whereas for other pathogens, such as *Plasmodium*, association with TEMs is a prerequisite (55). As demonstrated for HPV, virus/TEM association mediates endocytosis during which tetraspanins and viral particles are cointernalized into endosomes (52,56). Our study shows that HPV pseudovirions trigger endocytosis of CD81 molecules organized into platforms and that the formation of functional platforms requires the  $\delta$ -domain.

One strategy for interfering with pathogen entry employs antibodies directed against CD81/the large extracellular loop of CD81 (14,16,57). Our findings suggest that it would be sufficient to interfere with a much smaller binding interface (the  $\delta$ -domain is composed of only 11 aa), possibly using an aptamer that would be much cheaper to produce and capable of inhibiting proper CD81 platform formation, thereby preventing viral entry.

### Mechanisms of CD81 web formation and stabilization

Tetraspanins participate in different categories of interactions (5) that have been classified according to their resistance to detergents. The direct, first-level tetraspanin-partner interactions (22) survive harsh solubilization conditions and are supposed to be the most stable ones, whereas

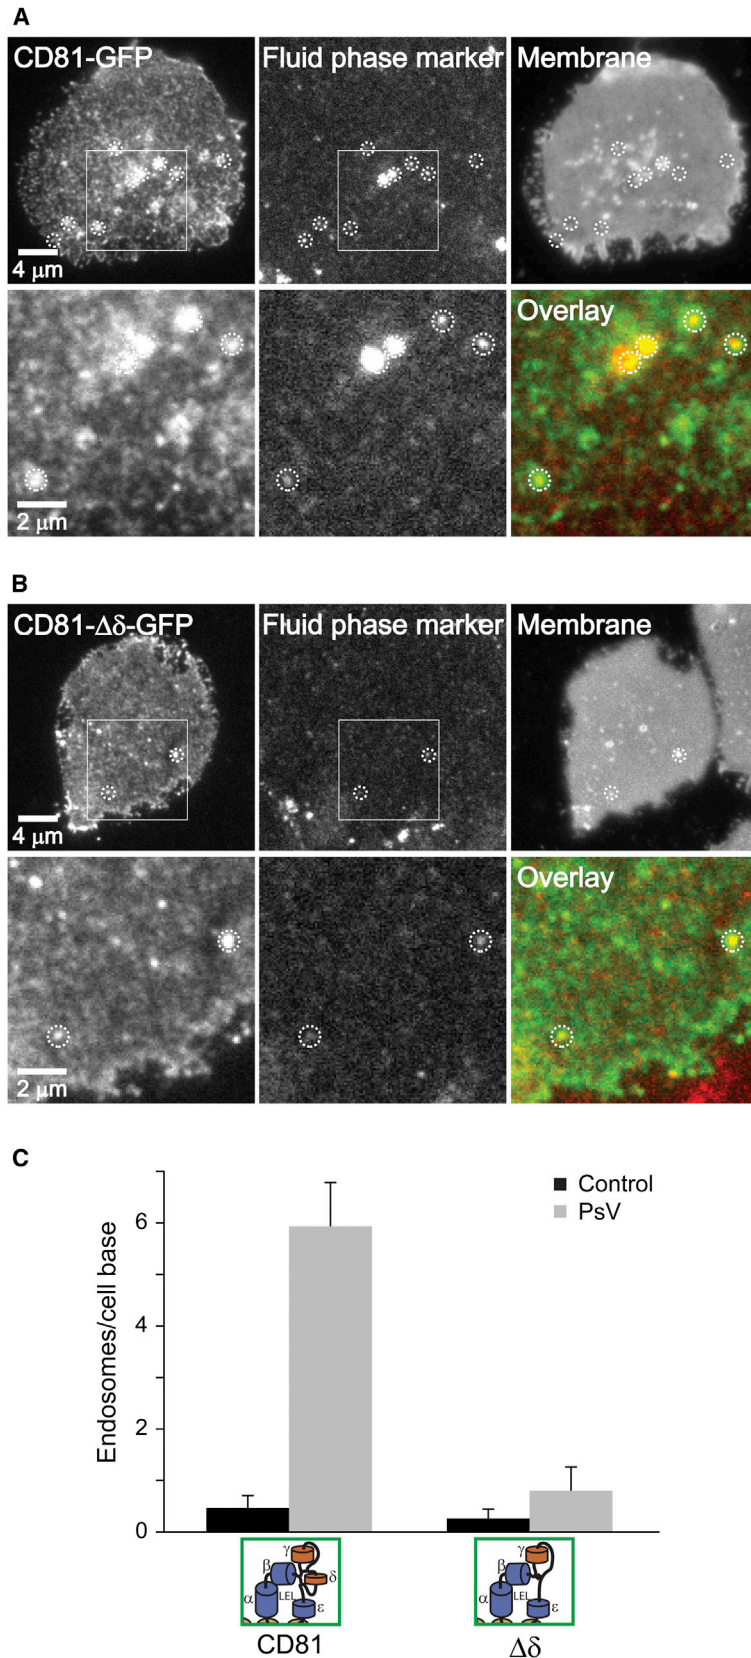

**FIGURE 6** Virus-triggered endocytosis requires the CD81  $\delta$ -domain. (A–C) Jukat cells expressing either CD81-GFP (A) or CD81- $\Delta\delta$ -GFP (B) were incubated in the presence of a fluid phase marker (20  $\mu$ M sulforhodamine) for 10 min at 37°C with (A and B; PsV) or without (control) HPV pseudovirions. Cells were then adsorbed onto coverslips at 37°C for 20 min, sonicated for the production of membrane sheets, fixed, washed, and images were taken in the green channel (CD81-GFP or CD81- $\Delta\delta$ -GFP), red channel (shows internalized fluid phase marker; *red spots* indicate sealed organelles associated with the plasma membrane), and blue channel (membrane, staining by the lipophilic dye TMA-DPH). As shown in (A), pseudovirions changed the pattern of CD81 domain distribution, leading to local accumulation of domains that often overlap with an endosome. At the site of endosome formation, the accumulation of plasma membrane was also detected in the TMA-DPH channel (see *bright spots*; *dotted circles* indicate identical pixel locations). (B) The pattern of CD81- $\Delta\delta$ -GFP is unaffected by PsVs and less endocytic organelles are observed. Squares in the upper panels indicate regions magnified and overlaid in the lower panels. (C) Quantification of endosomes per membrane sheet. Values are given as mean  $\pm$  SE ( $n = 3$  independent experiments; for one experiment 5 membrane sheets were analyzed). To see this figure in color, go online.

tetraspanin-tetraspanin contacts are second-level interactions and are only preserved using milder detergents (1,22). In some cases, the classification level 1 has also been used to refer to direct interactions (also including direct tetraspanin-tetraspanin interactions that are disrupted by strong detergents), whereas level 2 refers to secondary interactions via palmitate residues (3). In any case, the tetraspanin-partner pair model confers the interaction between CD81 and EWI-2 a pivotal role in the organization of TEMs. In addition, TEMs and microdomains in general are assumed to be the result of a developing network of interactions, suggesting that in a snapshot of the TEM, more or less every molecule has established direct contact to at least one other molecule and in a sense a TEM constitutes one large supra-molecular complex.

In two cell types, we found that the  $\delta$ -domain is required for CD81 segregation into CD81 rich clusters. Such clusters, but not those formed by CD81- $\Delta\delta$ , are capable of growing larger in the presence of EWI-2, but only in Jurkat T cells. The data confirm that the CD81/EWI-2 pair interaction plays a central role, albeit the primary complex per se is not sufficient. Additional interactions are required for the development of large TEMs, putatively involving also a CD81 dimerization step, as suggested by the decreased association of CD81 with CD81- $\Delta\delta$  in the immunoprecipitation experiments.

In the absence of weak hydrophobic interactions, for instance upon deletion of the  $\alpha$ - and  $\beta$ -helices (required for CD81 dimerization via a hydrophobic interface) or upon removal of palmitoylation sites, only small effects are observed. However, as we largely analyzed the static distribution of molecules in the plasma membrane, we cannot exclude that other regions of the LEL or palmitoylation play a more prominent role upstream of trafficking, e.g., in the endoplasmic reticulum or the Golgi-complex or that the mean residence time of CD81 in TEMs is reduced in their absence. Regarding palmitoylation, as pointed out by (1), palmitate moieties are dispensable for interactions between tetraspanins aside from stabilizing them, in line with the observation that depalmitoylation of CD9 slightly increases the diffusion coefficient by ~20% and mildly reduces the fraction of confined molecules by ~10% (46).

In any case, we conclude that the  $\delta$ -domain is essential for formation of CD81 clusters (as well as for colocalization of CD9 and CD81 (see Fig. 5) and EWI-2 and CD81 (see Fig. 4)), which serve as a starting point for the development of large TEMs, and thereby plays an essential role in regulating tetraspanin web dynamics.

Structural comparison of tetraspanins revealed that the variable domain of the LEL, inserted within the conserved domain and containing only a few conserved residues, differs between tetraspanins in length and secondary structure (58). If the  $\delta$ -domains in other tetraspanins were found to be equally essential for the formation of large TEMs (with other binding partners), it would be tempting to speculate

that this region defines in which biological process the respective tetraspanin acts via its ability to generate large TEMs. This view is in line with previous studies showing that CD9, carrying the LEL of CD81, is capable of acting like CD81 in viral entry (59).

Assuming a sequence of interactions, by which a supra-molecular TEM is generated, is an explanation complying with the previous expectation about how most microdomains in general, or in this case, TEMs do form. However, as will be discussed below, some findings may point to an alternative explanation based on cluster phases.

### Cluster phases as alternative explanation?

For many years, the enrichment and sorting of proteins in microdomains has been a major biological issue, yet it remains poorly understood. Originally, the phenomenon was explained by, e.g., picket fences capturing proteins in diffusion compartments (60) or by enrichment of certain proteins in lipid rafts generated through clustering of sphingolipids and cholesterol in the outer membrane (61,62). However, such mechanisms cannot explain the high degree of micropatterning observed, for instance, when two isoforms of a protein segregate into separate domains despite their high structural similarity (63–65). These observations, including findings made in this study, indicate that a more fundamental explanation, based on gain in free energy, plays a major role in micropatterning mechanisms, similar to the transition during condensed phase formation in solution.

Cluster phases arise from the competition between moderate short-range attractions—a few times the thermal energy  $k_B T$ —and longer range repulsion—in the range of, or lower than the thermal energy (66). Accordingly, small modulations of the attractive forces lead to the segregation (or sorting) of different proteins into specialized, distinct clusters, because the subsequent cost in entropy is counterbalanced by the gain of stabilizing interactions (66). Fig. S12 illustrates and explains the model in greater detail. In contrast to the classical image outlined previously, cluster phases rely on a dynamical point of view. For example, the interaction strength of the small  $\delta$ -domain can be only moderate, because it involves few residue-residue interactions. Such moderate attractions are unlikely to be stable on long timescales, but metastable, and thus to break through thermal agitation, explaining why in cluster phases most molecules are free to diffuse inside clusters and even, from time to time, to escape clusters and to diffuse freely in the membrane before being captured again by another cluster.

In this view,  $\delta$ -domains are involved in interactions of higher energetic affinity between CD81 and its partners (see Fig. S12), in addition to less specific forces. The low level of colocalization observed between CD81- $\Delta\delta$  and EWI-2 (Fig. 4 C) is then the result of a weakened interaction between CD81 and EWI-2, in line with previous reports that



the LEL is supporting (but not essential) for CD81-EWI-2 interactions (49). Pushing this hypothesis further, modulation of the small  $\delta$ -domains between different tetraspanins would promote their targeting to different cluster types to perform specific biological functions. Conversely, in the absence of  $\delta$ -domains, a different pattern of preferential interactions energies (as a result of interacting with other partners) generates different clusters (in our study, they are more unstable and not able to grow). The colocalization of CD81 and CD9 appears to follow the same logic. Apart from the findings in this study, other examples document that small modifications of a protein domain cause missorting or even declustering see, e.g. (67), which cannot be explained exclusively by weakening specifically one direct primary interaction, because that should decrease only the number of binary complexes but not their capability to coalesce into clusters.

The cluster phase model theoretically predicts (68) that increasing the concentration of a cluster component only marginally changes cluster size but significantly increases the number of clusters. In agreement with this prediction, we find more and apparently not larger clusters upon CD81 increase (see Fig. 1), a typical cluster phase behavior also observed previously, e.g., in (69). By contrast, the cluster phase model predicts growth of clusters when increasing the attractive forces, e.g., here, by overexpression of EWI-2 or by soluble interaction partners on the surface of viruses.

These arguments support the proposition that CD81 and its partners form cluster phases driven by free-energy gain, related either to weak interactions (e.g., hydrophobic surfaces or palmitoylation) or to moderate, more specific interactions involving the  $\delta$ -domain. Presently, this scenario can be considered just as a conceptual framework to be explored in the future to assess its relevance with respect to the classical one.

## SUPPORTING MATERIAL

Twelve figures and references (70–75) are available at [http://www.biophysj.org/biophysj/supplemental/S0006-3495\(14\)00562-1](http://www.biophysj.org/biophysj/supplemental/S0006-3495(14)00562-1).

The authors thank Dr. Fedor Berditchevski for critical comments on the manuscript.

This work was supported by grants from the Deutsche Forschungsgemeinschaft (SFB704 to T.L.) and the Johannes Gutenberg University of Mainz (intern-funding program to L.F.).

## REFERENCES

- Charrin, S., F. le Naour, ..., E. Rubinstein. 2009. Lateral organization of membrane proteins: tetraspanins spin their web. *Biochem. J.* 420:133–154.
- Rubinstein, E., F. Le Naour, ..., C. Boucheix. 1996. CD9, CD63, CD81, and CD82 are components of a surface tetraspan network connected to HLA-DR and VLA integrins. *Eur. J. Immunol.* 26:2657–2665.
- Hemler, M. E. 2005. Tetraspanin functions and associated microdomains. *Nat. Rev. Mol. Cell Biol.* 6:801–811.
- Berditchevski, F., and E. Odintsova. 2007. Tetraspanins as regulators of protein trafficking. *Traffic.* 8:89–96.
- Berditchevski, F., and E. Rubinstein. 2013. *Tetraspanins Proteins and Cell Regulation*. Springer, NY.
- Zhang, X. A., and C. Huang. 2012. Tetraspanins and cell membrane tubular structures. *Cell. Mol. Life Sci.* 69:2843–2852.
- Hemler, M. E. 2008. Targeting of tetraspanin proteins—potential benefits and strategies. *Nat. Rev. Drug Discov.* 7:747–758.
- Oren, R., S. Takahashi, ..., S. Levy. 1990. TAPA-1, the target of an anti-proliferative antibody, defines a new family of transmembrane proteins. *Mol. Cell. Biol.* 10:4007–4015.
- Geisert, Jr., E. E., R. W. Williams, ..., S. Levy. 2002. Increased brain size and glial cell number in CD81-null mice. *J. Comp. Neurol.* 453: 22–32.
- Pan, Y., D. F. Geisert, ..., E. E. Geisert. 2011. The effects of a CD81 null mutation on retinal pigment epithelium in mice. *Neurochem. Res.* 36:569–573.
- Rubinstein, E., A. Ziyat, ..., C. Boucheix. 2006. Reduced fertility of female mice lacking CD81. *Dev. Biol.* 290:351–358.
- Levy, S., and T. Shoham. 2005. The tetraspanin web modulates immune-signalling complexes. *Nat. Rev. Immunol.* 5:136–148.
- Pileri, P., Y. Uematsu, ..., S. Abrignani. 1998. Binding of hepatitis C virus to CD81. *Science.* 282:938–941.
- Silvie, O., E. Rubinstein, ..., D. Mazier. 2003. Hepatocyte CD81 is required for *Plasmodium falciparum* and *Plasmodium yoelii* sporozoite infectivity. *Nat. Med.* 9:93–96.
- Tham, T. N., E. Gouin, ..., J. Pizarro-Cerda. 2010. Tetraspanin CD81 is required for *Listeria monocytogenes* invasion. *Infect. Immun.* 78: 204–209.
- Spoden, G., K. Freitag, ..., L. Florin. 2008. Clathrin- and caveolin-independent entry of human papillomavirus type 16—involve ment of tetraspanin-enriched microdomains (TEMs). *PLoS ONE.* 3:e3313.
- Nydegger, S., S. Khurana, ..., M. Thali. 2006. Mapping of tetraspanin-enriched microdomains that can function as gateways for HIV-1. *J. Cell Biol.* 173:795–807.
- Krementsov, D. N., P. Rassam, ..., M. Thali. 2010. HIV-1 assembly differentially alters dynamics and partitioning of tetraspanins and raft components. *Traffic.* 11:1401–1414.
- van Spriel, A. B., and C. G. Figdor. 2010. The role of tetraspanins in the pathogenesis of infectious diseases. *Microbes Infect.* 12:106–112.
- Monk, P. N., and L. J. Partridge. 2012. Tetraspanins: gateways for infection. *Infect. Disord. Drug Targets.* 12:4–17.
- Boucheix, C., and E. Rubinstein. 2001. Tetraspanins. *Cell. Mol. Life Sci.* 58:1189–1205.
- Yáñez-Mó, M., O. Barreiro, ..., F. Sánchez-Madrid. 2009. Tetraspanin-enriched microdomains: a functional unit in cell plasma membranes. *Trends Cell Biol.* 19:434–446.
- Yang, X., C. Claas, ..., M. E. Hemler. 2002. Palmitoylation of tetraspanin proteins: modulation of CD151 lateral interactions, subcellular distribution, and integrin-dependent cell morphology. *Mol. Biol. Cell.* 13:767–781.
- Charrin, S., S. Manié, ..., E. Rubinstein. 2002. Differential stability of tetraspanin/tetraspanin interactions: role of palmitoylation. *FEBS Lett.* 516:139–144.
- Stipp, C. S., T. V. Kolesnikova, and M. E. Hemler. 2001. EWI-2 is a major CD9 and CD81 partner and member of a novel Ig protein subfamily. *J. Biol. Chem.* 276:40545–40554.
- Delandre, C., T. R. Penabaz, ..., R. J. Clem. 2009. Mutation of juxta-membrane cysteines in the tetraspanin CD81 affects palmitoylation and alters interaction with other proteins at the cell surface. *Exp. Cell Res.* 315:1953–1963.
- Berditchevski, F., E. Odintsova, ..., E. Gilbert. 2002. Expression of the palmitoylation-deficient CD151 weakens the association of alpha 3

- beta 1 integrin with the tetraspanin-enriched microdomains and affects integrin-dependent signaling. *J. Biol. Chem.* 277:36991–37000.
28. Seigneuret, M. 2006. Complete predicted three-dimensional structure of the facilitator transmembrane protein and hepatitis C virus receptor CD81: conserved and variable structural domains in the tetraspanin superfamily. *Biophys. J.* 90:212–227.
  29. Kitadokoro, K., D. Bordo, ..., M. Bolognesi. 2001. CD81 extracellular domain 3D structure: insight into the tetraspanin superfamily structural motifs. *EMBO J.* 20:12–18.
  30. Kitadokoro, K., M. Ponassi, ..., M. Bolognesi. 2002. Subunit association and conformational flexibility in the head subdomain of human CD81 large extracellular loop. *Biol. Chem.* 383:1447–1452.
  31. Rajesh, S., P. Sridhar, ..., M. Overduin. 2012. Structural basis of ligand interactions of the large extracellular domain of tetraspanin CD81. *J. Virol.* 86:9606–9616.
  32. Stipp, C. S., T. V. Kolesnikova, and M. E. Hemler. 2003. Functional domains in tetraspanin proteins. *Trends Biochem. Sci.* 28:106–112.
  33. DeSalle, R., R. Mares, and A. Garcia-España. 2010. Evolution of cysteine patterns in the large extracellular loop of tetraspanins from animals, fungi, plants and single-celled eukaryotes. *Mol. Phylogenet. Evol.* 56:486–491.
  34. Zacharias, D. A., J. D. Violin, ..., R. Y. Tsien. 2002. Partitioning of lipid-modified monomeric GFPs into membrane microdomains of live cells. *Science.* 296:913–916.
  35. Campbell, R. E., O. Tour, ..., R. Y. Tsien. 2002. A monomeric red fluorescent protein. *Proc. Natl. Acad. Sci. USA.* 99:7877–7882.
  36. Lauria, I., J. van Üüm, ..., T. Lang. 2013. GLTP mediated non-vesicular GM1 transport between native membranes. *PLoS ONE.* 8:e59871.
  37. Zilly, F. E., N. D. Halemani, ..., T. Lang. 2011. Ca<sup>2+</sup> induces clustering of membrane proteins in the plasma membrane via electrostatic interactions. *EMBO J.* 30:1209–1220.
  38. Adler, J., and I. Parmryd. 2010. Quantifying colocalization by correlation: the Pearson correlation coefficient is superior to the Mander's overlap coefficient. *Cytometry A.* 77:733–742.
  39. Spoden, G. A., K. Besold, ..., L. Florin. 2012. Polyethylenimine is a strong inhibitor of human papillomavirus and cytomegalovirus infection. *Antimicrob. Agents Chemother.* 56:75–82.
  40. Avery, J., D. J. Ellis, ..., R. Jahn. 2000. A cell-free system for regulated exocytosis in PC12 cells. *J. Cell Biol.* 148:317–324.
  41. Heuser, J. 1989. Effects of cytoplasmic acidification on clathrin lattice morphology. *J. Cell Biol.* 108:401–411.
  42. Sieber, J. J., K. I. Willig, ..., T. Lang. 2007. Anatomy and dynamics of a supramolecular membrane protein cluster. *Science.* 317:1072–1076.
  43. Mittelbrunn, M., M. Yáñez-Mó, ..., F. Sánchez-Madrid. 2002. Cutting edge: dynamic redistribution of tetraspanin CD81 at the central zone of the immune synapse in both T lymphocytes and APC. *J. Immunol.* 169:6691–6695.
  44. Drummer, H. E., K. A. Wilson, and P. Pountourios. 2005. Determinants of CD81 dimerization and interaction with hepatitis C virus glycoprotein E2. *Biochem. Biophys. Res. Commun.* 328:251–257.
  45. Barreiro, O., M. Zamai, ..., F. Sánchez-Madrid. 2008. Endothelial adhesion receptors are recruited to adherent leukocytes by inclusion in preformed tetraspanin nanoplateforms. *J. Cell Biol.* 183:527–542.
  46. Espenel, C., E. Margeat, ..., P. E. Milhiet. 2008. Single-molecule analysis of CD9 dynamics and partitioning reveals multiple modes of interaction in the tetraspanin web. *J. Cell Biol.* 182:765–776.
  47. Harris, H. J., C. Clerte, ..., J. A. McKeating. 2013. Hepatoma polarization limits CD81 and hepatitis C virus dynamics. *Cell. Microbiol.* 15:430–445.
  48. Charrin, S., F. Le Naour, ..., E. Rubinstein. 2003. EWI-2 is a new component of the tetraspanin web in hepatocytes and lymphoid cells. *Biochem. J.* 373:409–421.
  49. Montpellier, C., B. A. Tews, ..., L. Cocquerel. 2011. Interacting regions of CD81 and two of its partners, EWI-2 and EWI-2wint, and their effect on hepatitis C virus infection. *J. Biol. Chem.* 286:13954–13965.
  50. Rocha-Perugini, V., C. Montpellier, ..., L. Cocquerel. 2008. The CD81 partner EWI-2wint inhibits hepatitis C virus entry. *PLoS ONE.* 3:e1866.
  51. Potel, J., P. Rassam, ..., L. Cocquerel. 2013. EWI-2wint promotes CD81 clustering that abrogates Hepatitis C Virus entry. *Cell. Microbiol.* 15:1234–1252.
  52. Scheffer, K. D., A. Gawlitza, ..., L. Florin. 2013. Tetraspanin CD151 mediates papillomavirus type 16 endocytosis. *J. Virol.* 87:3435–3446.
  53. Collier, K. E., K. L. Berger, ..., G. Randall. 2009. RNA interference and single particle tracking analysis of hepatitis C virus endocytosis. *PLoS Pathog.* 5:e1000702.
  54. Rocha-Perugini, V., M. Lavie, ..., L. Cocquerel. 2009. The association of CD81 with tetraspanin-enriched microdomains is not essential for Hepatitis C virus entry. *BMC Microbiol.* 9:111.
  55. Silvie, O., S. Charrin, ..., E. Rubinstein. 2006. Cholesterol contributes to the organization of tetraspanin-enriched microdomains and to CD81-dependent infection by malaria sporozoites. *J. Cell Sci.* 119:1992–2002.
  56. Scheffer, K. D., R. Popa-Wagner, and L. Florin. 2013. Isolation and characterization of pathogen-bearing endosomes enable analysis of endosomal escape and identification of new cellular cofactors of infection. *Methods Mol. Biol.* 1064:101–113.
  57. Meuleman, P., J. Hesselgesser, ..., G. Leroux-Roels. 2008. Anti-CD81 antibodies can prevent a hepatitis C virus infection in vivo. *Hepatology.* 48:1761–1768.
  58. Seigneuret, M., A. Delaguillaumie, ..., H. Conjeaud. 2001. Structure of the tetraspanin main extracellular domain. A partially conserved fold with a structurally variable domain insertion. *J. Biol. Chem.* 276:40055–40064.
  59. Zhang, J., G. Randall, ..., J. A. McKeating. 2004. CD81 is required for hepatitis C virus glycoprotein-mediated viral infection. *J. Virol.* 78:1448–1455.
  60. Kusumi, A., C. Nakada, ..., T. Fujiwara. 2005. Paradigm shift of the plasma membrane concept from the two-dimensional continuum fluid to the partitioned fluid: high-speed single-molecule tracking of membrane molecules. *Annu. Rev. Biophys. Biomol. Struct.* 34:351–378.
  61. Chen, Y., B. Yang, and K. Jacobson. 2004. Transient confinement zones: a type of lipid raft? *Lipids.* 39:1115–1119.
  62. Lingwood, D., and K. Simons. 2010. Lipid rafts as a membrane-organizing principle. *Science.* 327:46–50.
  63. Uhles, S., T. Moede, ..., I. B. Leibiger. 2003. Isoform-specific insulin receptor signaling involves different plasma membrane domains. *J. Cell Biol.* 163:1327–1337.
  64. Kai, M., F. Sakane, ..., H. Kanoh. 2006. Lipid phosphate phosphatases 1 and 3 are localized in distinct lipid rafts. *J. Biochem.* 140:677–686.
  65. Low, S. H., A. Vasanji, ..., T. Weimbs. 2006. Syntaxins 3 and 4 are concentrated in separate clusters on the plasma membrane before the establishment of cell polarity. *Mol. Biol. Cell.* 17:977–989.
  66. Meilhac, N., and N. Destainville. 2011. Clusters of proteins in biomembranes: insights into the roles of interaction potential shapes and of protein diversity. *J. Phys. Chem. B.* 115:7190–7199.
  67. Schreiber, A., S. Fischer, and T. Lang. 2012. The amyloid precursor protein forms plasmalemmal clusters via its pathogenic amyloid- $\beta$  domain. *Biophys. J.* 102:1411–1417.
  68. Destainville, N., and L. Foret. 2008. Thermodynamics of nanocluster phases: a unifying theory. *Phys. Rev. E Stat. Nonlin. Soft Matter Phys.* 77:051403.
  69. Sieber, J. J., K. I. Willig, ..., T. Lang. 2006. The SNARE motif is essential for the formation of syntaxin clusters in the plasma membrane. *Biophys. J.* 90:2843–2851.
  70. Flint, M., C. Maidens, ..., J. A. McKeating. 1999. Characterization of hepatitis C virus E2 glycoprotein interaction with a putative cellular receptor, CD81. *J. Virol.* 73:6235–6244.

71. Poger, D., and A. E. Mark. 2010. On the validation of molecular dynamics simulations of saturated and *cis*-monounsaturated phosphatidylcholine lipid bilayers: a comparison with experiment. *J. Chem. Theory Comput.* 6:325–336.
72. Schmidt, T. H., and C. Kandt. 2012. LAMBADA and inflateGRO2: efficient membrane alignment and insertion of membrane proteins for molecular dynamics simulations. *J. Chem. Inf. Model.* 52:2657–2669.
73. Humphrey, W., A. Dalke, and K. Schulten. 1996. VMD: visual molecular dynamics. *J. Mol. Graphics Modell.* 14:33–38.
74. Frishman, D., and P. Argos. 1995. Knowledge-based protein secondary structure assignment. *Proteins: Struct. Funct. Bioinf.* 23:566–579.
75. Weitz, S., and N. Destainville. 2013. Attractive asymmetric inclusions in elastic membranes under tension: cluster phases and membrane invaginations. *Soft Matter.* 9:7801.



## Supporting Material

### **The Extracellular $\delta$ -Domain is Essential for the Formation of CD81 Tetraspanin Webs**

Yahya Homs<sup>1</sup>, Jan-Gero Schloetel<sup>1</sup>, Konstanze D. Scheffer<sup>3</sup>, Thomas H. Schmidt<sup>1</sup>, Nicolas Destainville<sup>2</sup>, Luise Florin<sup>3</sup> and Thorsten Lang<sup>1,\*</sup>

<sup>1</sup>Department of Membrane Biochemistry, Life & Medical Sciences (LIMES) Institute, University of Bonn, Bonn, Germany, <sup>2</sup>Université Toulouse 3-Paul Sabatier, UPS, Laboratoire de Physique Théorique (IRSAMC), Toulouse, France, <sup>3</sup>Department of Medical Microbiology and Hygiene, University Medical Centre of the Johannes Gutenberg University, Mainz, Germany.

\*To whom correspondence should be addressed.  
Email: thorsten.lang@uni-bonn.de (T.L.)

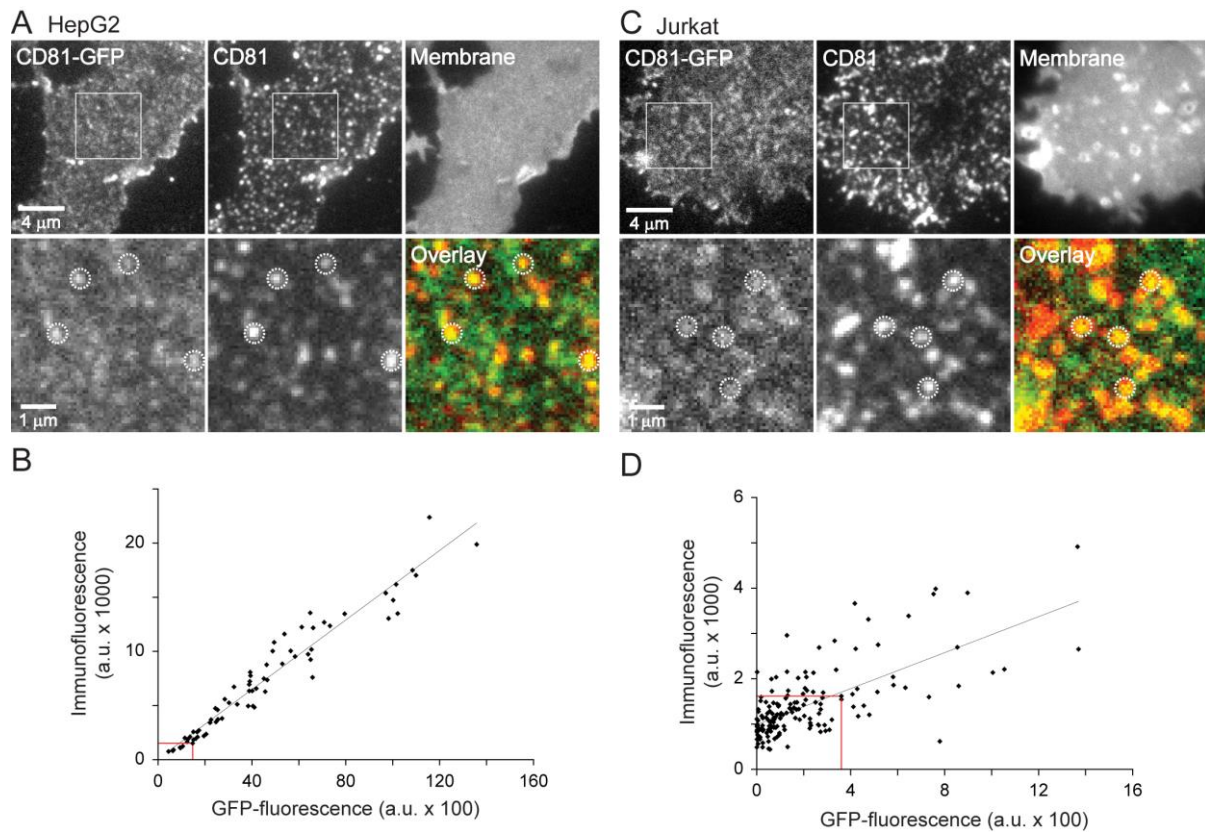

**Fig. S1.** Overexpressed and endogenous CD81 in HepG2 and Jurkat T cells.

(A) HepG2 cells lacking endogenous CD81 were transfected with CD81-GFP; membrane sheets were generated and immunostained for CD81. Upper panel, left, CD81-GFP was non-homogeneously distributed in the plasma membrane. Middle, the antibody recognized preferentially CD81 molecules organized in spotty structures. Right, staining with the lipophilic dye TMA-DPH for documenting the membrane integrity.

Lower panels, magnified views and overlay for illustration of the high similarity between both channels. Though the antibody has a preference for the larger domains, the Pearson correlation coefficient (PCC, for explanation see text) between the two channels was still high, yielding a value of  $0.57 \pm 0.09$  (mean  $\pm$  SD;  $n = 70$  membranes from 3 independent experiments) which is similar to a previously measurement of 0.63 (1) from a double tagged protein, supposed to provide a reference for perfect colocalization.

(B) Linear relation between the red and green signals with an intercept close to 0 confirms that HepG2 cells lack endogenous CD81.

(C) Membrane sheet from a Jurkat T cell overexpressing CD81-GFP. Upper panel, left; in Jurkat cells CD81-GFP was also non-homogeneously distributed within the plasma membrane and again the antibody was more sensitive for the spotty CD81-GFP. Please note that membranes were not treated with detergent as to preserve the membrane structure. As Jurkat cell membrane sheets were larger than those produced from HepG2 cells, the antibody recognizing an extracellular epitope (2) did not always reach the molecules in the center of the membranes (see upper middle panel). In these cases only strongly stained peripheral regions were analyzed. The PCC between the two channels was  $0.52 \pm 0.08$  (mean  $\pm$  SD;  $n = 32$  membranes collected from 4 independent experiments), close to 0.57 (HepG2 cells), indicating that immunostained endogenous CD81 does not form patterns different from CD81-GFP.

(D) Linear relationship between immunostaining intensity and GFP fluorescence. The offset indicates the level of endogenous CD81 (staining in the absence of overexpressed CD81-

GFP) showing that the ratio between overexpressed and endogenous CD81 is close to 1 in most membrane sheets suggesting that in general overexpression hardly doubled endogenous CD81 levels. Scattering around the linear regression line is higher than in HepG2 cells due to variable endogenous CD81 levels.

Immunostaining and GFP intensities are not comparable between the two cell types (see also methods for different incubation times with antibodies and different recording times). Red lines indicate the membranes shown in A and C, respectively.



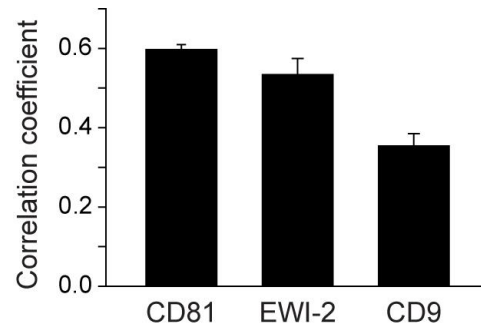

**Fig. S2.** Values of the PCC between CD81 and CD81, EWI-2 or CD9.

The figure shows the average absolute value obtained for the correlation between CD81-GFP and CD81-RFP (from Fig. 2;  $n = 15$ ), CD81-GFP and EWI-2-RFP (from Fig. 5;  $n = 6$ ) and CD81-GFP and CD9-RFP (from Fig. 6;  $n = 3$ ).

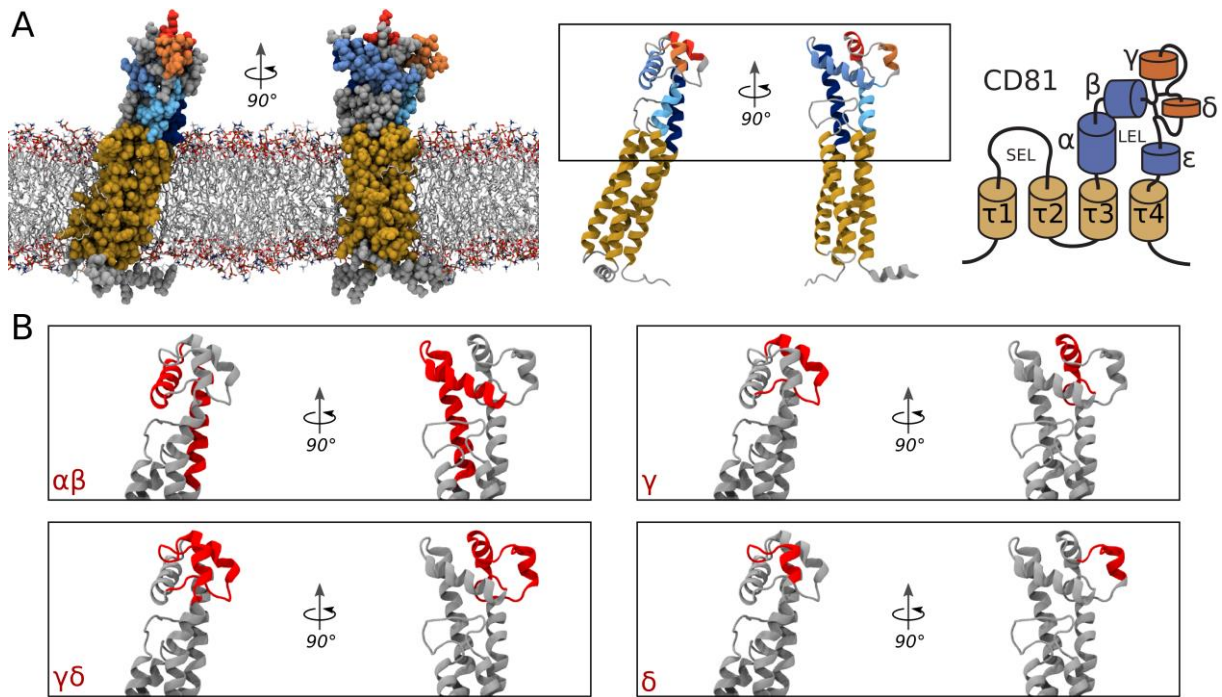

**Fig. S3.** Illustration of deleted domains within the LEL of CD81.

(A) Left, atomistic structural model of human CD81 based on (3) embedded in a lipid bilayer; middle, ribbon representation; right, pictogram as used in the main text. Structural components are colored as follows: transmembrane helices ( $\tau 1$  to  $\tau 4$ ) = goldenrod; helices of the extracellular domain conserved region = dark-blue/blue/light-blue ( $\alpha/\beta/\epsilon$ ) or blue in the pictogram; variable region = red/orange ( $\gamma/\delta$ ) or orange in the pictogram.

Left, the protein structure (united-atom representation) was embedded in a pre-equilibrated POPC (1-palmitoyl-2-oleoyl-sn-glycero-3-phosphocholine) model membrane (4) using the LAMBADA and InflateGRO2 routines for the system setup of Molecular Dynamics simulations (5).

(B) Detail views of the extracellular domain with the highlighted domains  $\alpha\beta$ ,  $\gamma$ ,  $\gamma\delta$ , and  $\delta$  deleted in the constructs  $\Delta\alpha\beta$ ,  $\Delta\gamma$ ,  $\Delta\gamma\delta$ , and  $\Delta\delta$ , respectively. Molecular illustrations were generated using VMD (6) and the integrated STRIDE routine (7).

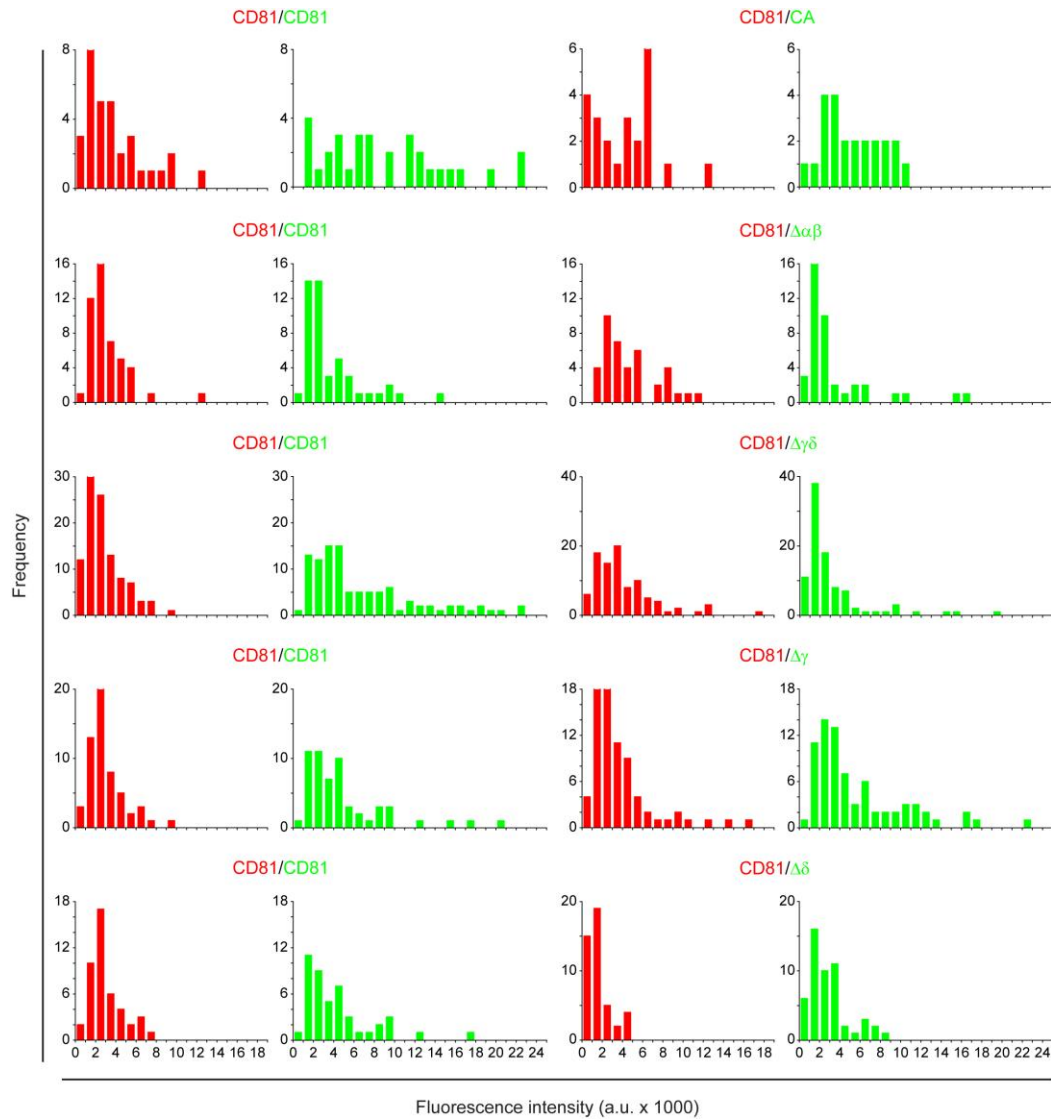

**Fig. S4.** Histograms from the expression levels of CD81-RFP/CD81-GFP and CD81-RFP/GFP-labelled constructs in individual membrane sheets. Histograms show the distribution of fluorescence intensities determined from individual membrane sheets in the red (RFP) or green (GFP) channel. Plotted are absolute frequency counts against intensity, starting at 0 and adjusting the bins width to 1000 (a.u.). Intensity values in the red channel tended to be lower (exposure time for the red channel was two-fold the one used for the green channel). In each panel, two red/green pairs are shown. The first pair shows the distributions of CD81-RFP and CD81-GFP in the respective control to which values for the tested construct, shown in the second pair, were normalized (for clarity we pooled all membrane sheets from different days belonging to the respective control and the corresponding condition).

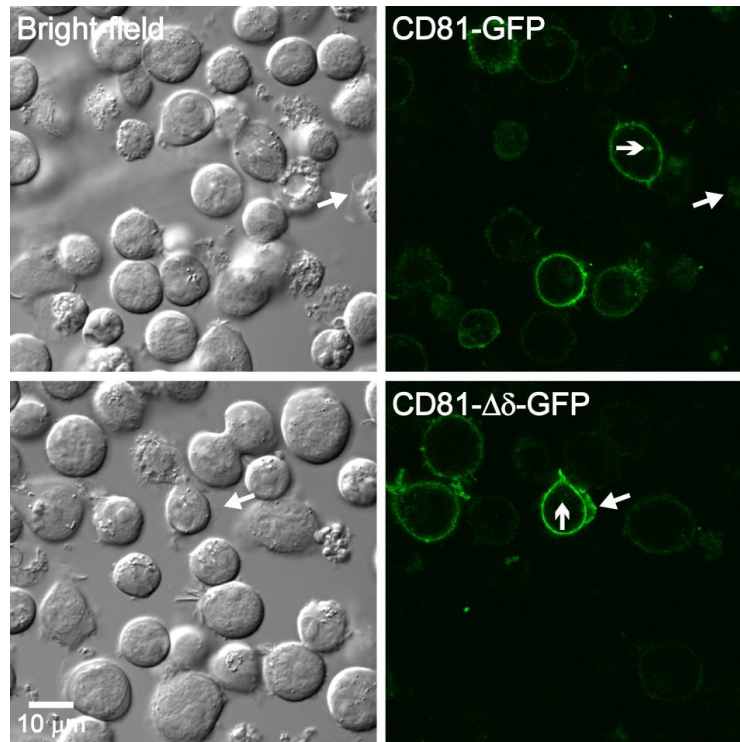

**Fig. S5.** Subcellular distribution of CD81-GFP and CD81- $\Delta\delta$ -GFP in live Jurkat T cells. Cells were imaged by confocal microscopy in suspension (cells were settled down onto uncoated coverslips). Left, bright-field; right GFP fluorescence. Cells were imaged in Ringer solution at RT. Fluorescence was almost exclusively at the plasma membrane showing a ring-like pattern, sometimes cells established lamellipodial contacts visible as green extensions (compare closed arrows in the brightfield and fluorescence pictures). Occasionally, accumulation of intracellular fluorescence was observed (open arrows), possibly CD81 retained in the Golgi apparatus (8). Representative images at arbitrary scalings from one, out of four, experiment.



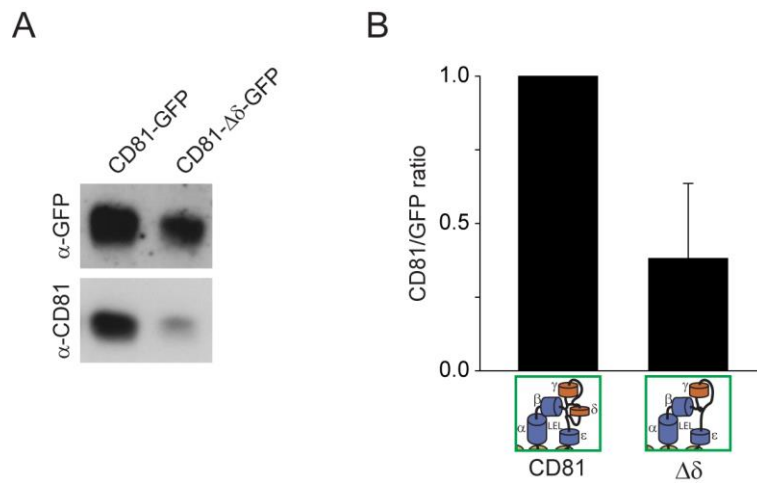

**Fig. S6.** Immunoprecipitation of endogenous CD81 by overexpressed CD81-GFP and CD81- $\Delta\delta$ -GFP. Transfection was performed as described above using  $10^7$  Jurkat cells for each condition. Two days after transfection, cells were harvested in HEPES buffer (150 mM NaCl, 5 mM MgCl<sub>2</sub>, 25 mM HEPES pH 7.2) and lysed in 1 ml HEPES supplemented with 1% CHAPS (C5070, Sigma-Aldrich), Protease inhibitor cocktail (Roche, Mannheim, Germany) and 10  $\mu$ M PMSF. The solution was incubated under rotation at 4 °C for 2 hr. The lysate was centrifuged for 5 min at 6,000 rpm (Eppendorf centrifuge 5430 R) and supernatant was incubated with 30  $\mu$ l of GFP-Trap® A beads decorated with recombinant antibody fragments (Chromotek) for 2 hr at 4 °C. Beads were harvested by centrifugation for 2 min at 2,500 g, washed twice with 500  $\mu$ l HEPES buffer and prepared for standard western blot analysis under non-reducing conditions.

(A) Upper panel, precipitated CD81-GFP and CD81- $\Delta\delta$ -GFP were detected using anti-GFP antibody (diluted 1:10,000, mouse monoclonal JL8, cat#632381, Clontech). Lower panel, for detection of co-precipitated endogenous CD81, anti-CD81 antibody (diluted 1:200, mouse monoclonal 1.3.3.22, cat#sc-7637, SantaCruz) was used.

(B) For quantification of the ability of CD81-GFP or CD81- $\Delta\delta$ -GFP to co-precipitate endogenous CD81, first the ratios between the endogenous CD81 band and the respective bands of the overexpressed GFP-constructs were calculated. To correct for input level variations, the CD81/CD81- $\Delta\delta$ -GFP ratio was normalized to the ratio of CD81/CD81-GFP. Values are shown as mean  $\pm$  SD (n = 3 independent experiments).

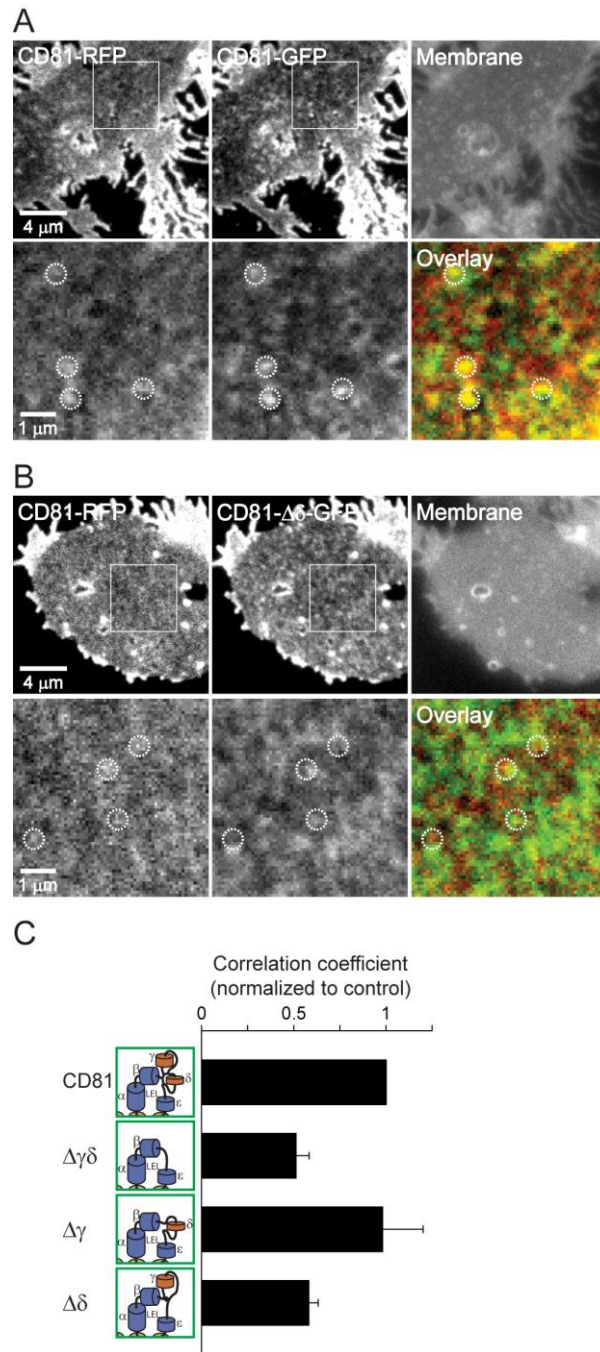

**Fig. S7.** Targeting of CD81 to CD81 enriched domains in HepG2 cells. Membrane sheets from HepG2 cells co-overexpressing CD81-RFP along with CD81-GFP (A), CD81- $\Delta\gamma\delta$ -GFP, CD81- $\Delta\gamma$ -GFP or CD81- $\Delta\delta$ -GFP (B) were recorded and analysed (C) as described in Fig. 2 (for explanation of the pictograms see legend of Fig. 2). Values are given as means  $\pm$  SE (n = 3 - 5 independent experiments; for each experiment values from 5 - 19 membrane sheets were averaged and normalized to control).

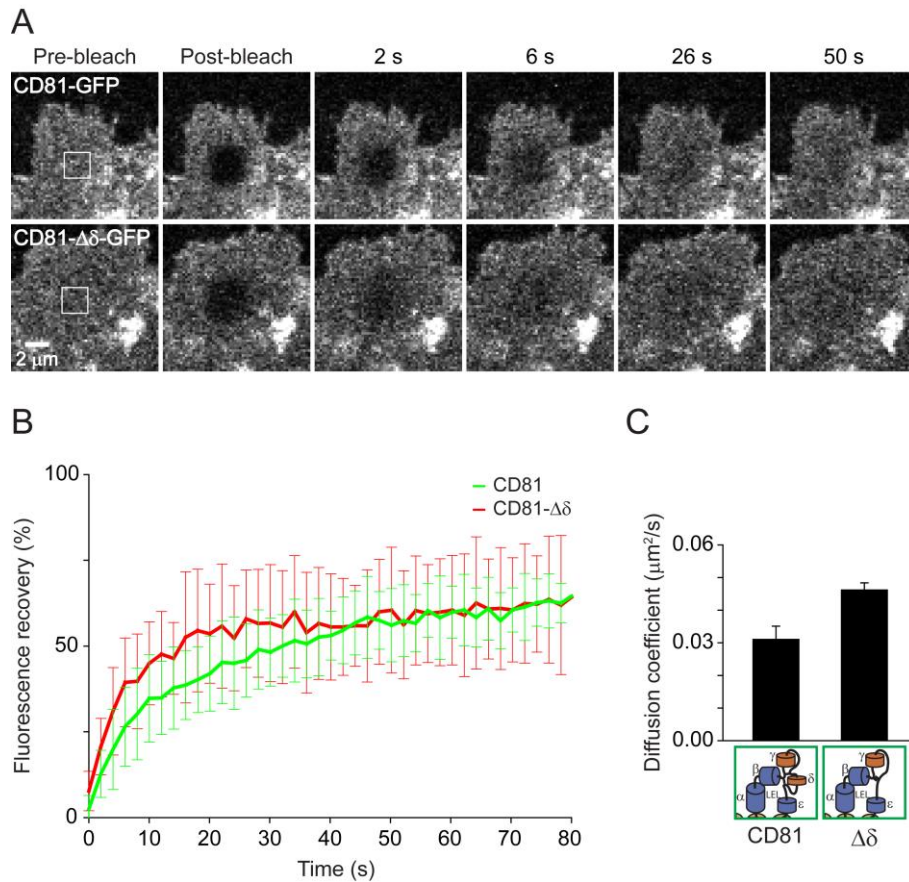

**Fig. S8.** Apparent lateral diffusion coefficients measured by fluorescence recovery after photobleaching (FRAP).

(A) Image sequences of living Jurkat T cells (essentially prepared as for TIRF microscopy experiments) expressing either CD81-GFP (upper panel) or CD81- $\Delta\delta$ -GFP (lower panel) recorded at 0.5 Hz. Shown are images before bleaching (pre-bleach) of a 10 x 10 pixel ROI (corresponding to an area of approximately 2.1  $\mu\text{m}$  x 2.1  $\mu\text{m}$ ; indicated by the white square in the pre-bleach image), directly after bleaching (post-bleach) and at given time points after bleaching (showing individual images at 2, 6, 26 and 50 s), documenting repopulation of the bleached area by unbleached molecules.

(B) FRAP recovery trace analysis. The entire recordings lasted about 160 s. Due to occasional instability at the end of the recordings, only the first 80 s were included in the analysis of recovery kinetics. Only those cells were analyzed that showed less than 15% intensity deviation in a control region (next to the ROI used for bleaching) after 80 s when compared to the beginning. We also excluded cells with very low and very high expression levels. For one independent day, for each condition we averaged the background corrected normalized recovery traces of 3 - 11 cells (see example average traces in B; error bars illustrate the standard deviation between individual cells). From the traces we determined the half-times of recovery by graph fitting and calculated from the half-times the apparent lateral diffusion coefficients (for details see (9)).

(C) Diffusion coefficients of CD81-GFP and CD81- $\Delta\delta$ -GFP. Values are given as mean  $\pm$  SE (n = 4).

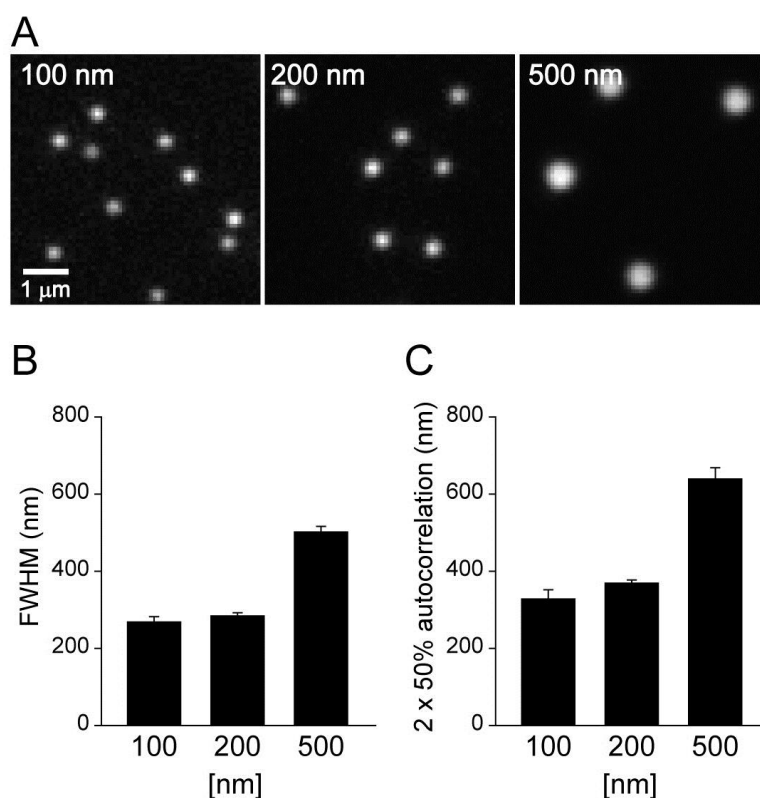

**Fig. S9.** Size measurement by autocorrelation analysis.

(A) 100 nm, 200 nm or 500 nm beads were imaged in the green channel. A region of interest (see images) with a variable number of beads was analyzed by linescans (B) and autocorrelation analysis (C). (B) To the intensity profiles measured by the linescans Gaussian distributions were fitted. From the fit, the full width at half maximum (FWHM) corresponds to the size of the bead. The FWHM values of the beads in one image were averaged. For each condition five images were analyzed. Values are given as mean  $\pm$  SD ( $n = 5$  images).

(C) For autocorrelation analysis the pixels in the region of interest were aligned with the original image and the correlation coefficient determined (yielding 1, corresponds to 100%). Then the Pixels were shifted in one direction by 1 pixel followed by calculation of the correlation coefficient, which was repeated until the correlation gets close to zero (see methods for details). The larger the objects in the image the larger is the pixel shift required for a drop in the correlation coefficient to 50%. The shift at which a drop to 50% is observed is a rough measure for the average radial size of the particles in the image. For better comparison with the FWHM which correspond to the diameter, the autocorrelation values were multiplied by 2. Please note that the point spread function of the microscope blurs the bead size and that differences in size are hardly noticed when structures have dimensions in the range of the microscope resolution (compare measured size of 100 nm and 200 nm beads). Therefore the obtained size values do not represent absolute values, yet they allow the detection of trends and provide lower estimates of size differences.



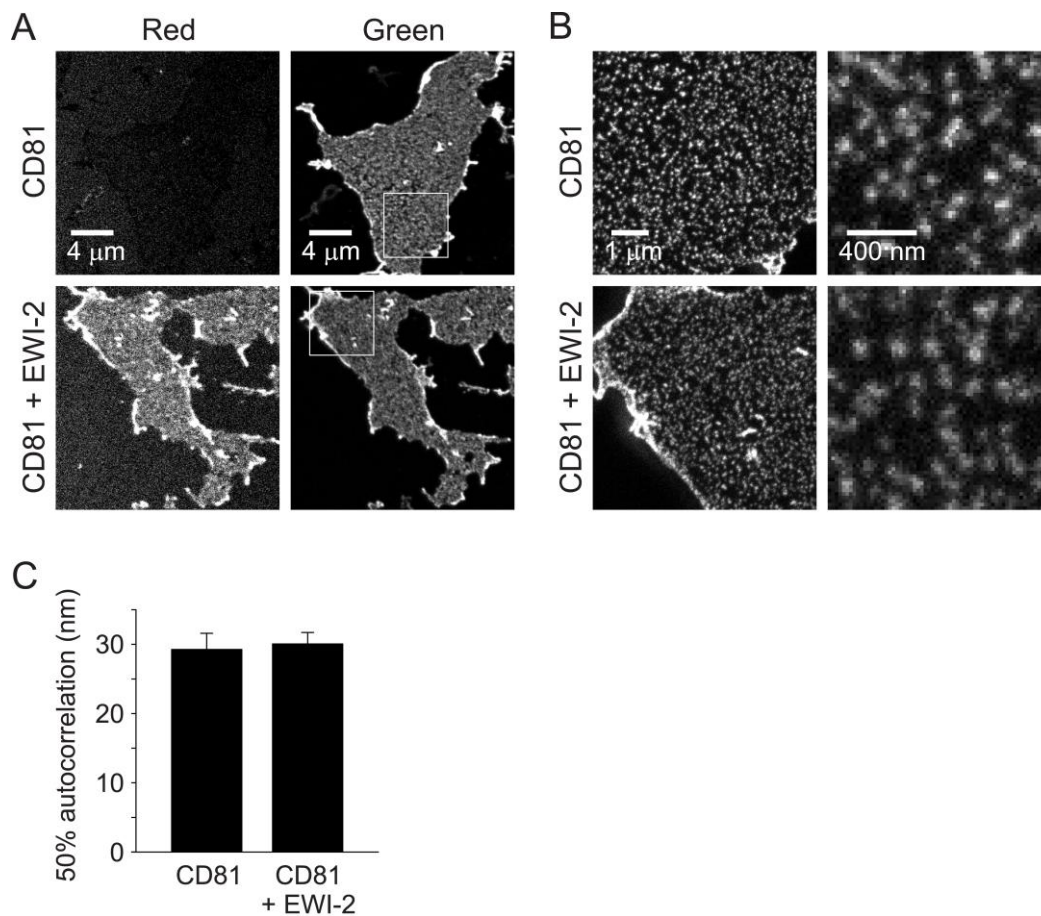

**Fig. S10.** CD81 clusters in HepG2 cells are small even upon elevation of EWI-2.

Membrane sheets from Fig. 1 were analysed in addition to membrane sheets from HepG2 cells expressing CD81-GFP with EWI-2-RFP. CD81-GFP was visualized using STED microscopy as described in Fig. 1.

(A) Confocal images were used to verify that membranes originate from cells expressing EWI-2-RFP (red channel) and/or CD81-GFP (green channel). Upper panels, membrane sheet #2 from Fig 1A shown with grey scale look up table, confirming absence of EWI-2 expression. Lower panels, membrane sheet from a cell expressing both EWI-2-RFP and CD81-GFP. The same scaling was applied among red channel images and among green channel images, respectively.

(B) Left, sections from larger STED micrographs, corresponding to the white squares in A. On each original STED micrograph three ROIs (one shown in the right panel) were selected for cluster size analysis by autocorrelation (for details see methods). Images are shown at the same scalings.

(C) CD81-cluster size in HepG2 membrane sheets remains small even upon overexpression of EWI-2. Values are given as means  $\pm$  SE ( $n=3$  independent experiments; for each experiment 5 - 13 sheets were averaged).

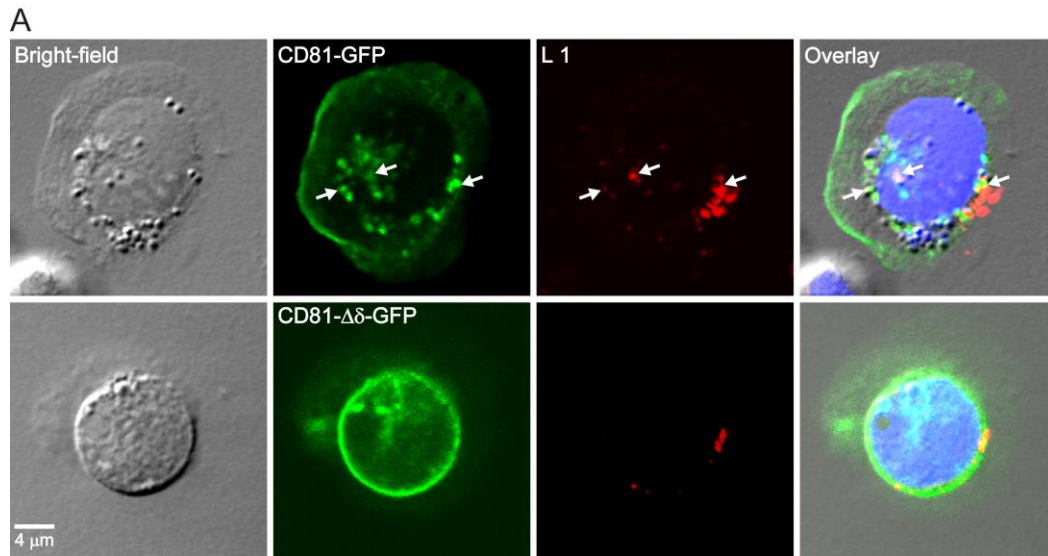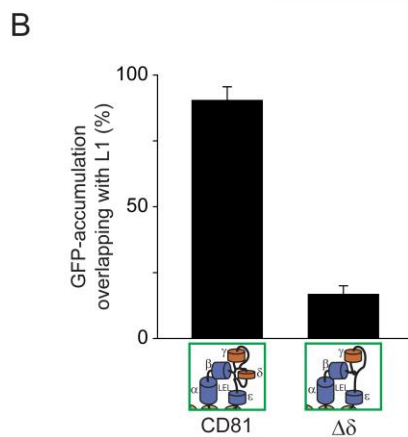

**Fig. S11.** PsV uptake analyzed by confocal microscopy.

(A) Transfected Jurkat T cells were incubated for 1 hr at 37 °C with PsVs, glass adhered, fixed and immunostained for the PsV protein L1. Because they have a large nucleus and during adhesion part of the plasma membrane spreads across the glass coverslip, most cytosolic structures are found in a thin layer beyond the glass. Confocal sections were taken from this layer. In some cases, due to the small cytosolic volume even in regions close to the glass-coverslip the plasma membrane closely associated to the nucleus (see lower panel). Arrows indicate identical locations in the different channels. Images are shown at arbitrary scalings.

(B) Percentage of cells in which at least one patch of accumulated CD81-GFP or CD81- $\Delta\delta$ -GFP was detected (by manual counting) that overlapped with stained viral particles. These accumulations likely correspond to the accumulations of CD81-GFP observed on membrane sheets overlapping with fluid phase marker (Fig. 6). For one experiment, per condition 9 - 11 cells were analyzed. Values are given as mean  $\pm$  SE (n = 3).

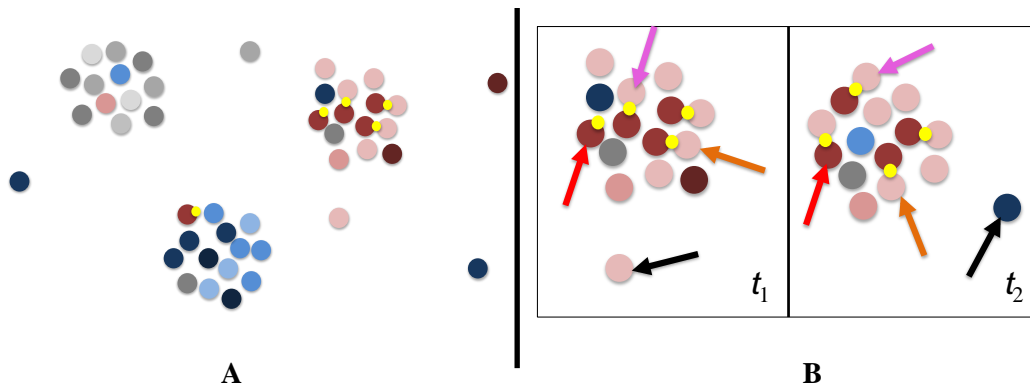

**Fig. S12.** Schematic view of the cluster phase scenario and its dynamics.

(A) Sub-micrometric domains, containing a few tens or hundreds of proteins arise from the competition between moderate short-range attractions – a few times the thermal energy  $k_B T$  – which favor a condensed phase, and longer-range repulsion – in the range of, or lower than the thermal energy – preventing complete condensation into a macro-phase. Physical origins of repulsion could be the development of steric hindrance within clusters (10) or, as recently proposed in (11), a mechanism involving weak spontaneous membrane curvature induced by proteins due to, e.g., their crystallographic shape. Proteins having a slightly better energetic affinity tend to segregate into distinct clusters, represented here by different colors (grey, red and blue). Inside a given cluster, proteins of different species cohabit, represented by different hues of a given color. The yellow dot illustrates a specific interaction site of the brick-red proteins, which strengthens the interaction with the pink ones, and makes it specific, i.e. is at the origin of the better energetic affinity between both protein species, and thus favors their segregation. Note however that some missorting can exist, but it is rare (12). In the context of this paper, CD81 and EWI-2 would be one pair of binding partners within a cluster similar to the pair pictured in brick-red/pink with yellow dots illustrating the role of the  $\delta$ -domains).

(B) Enlarged view of the red cluster at two successive times  $t_2 > t_1$ . Proteins enjoy lateral diffusion inside the clusters also when interacting (yellow dot) with partner proteins (see pair indicated by purple arrows). Even within a dense cluster, one can assume that the brick-red proteins enjoy rotational diffusion (a rapid process occurring on the  $10 \mu\text{s}$  timescale (12)), swap interaction partners (brick-red protein interacting with two different proteins, indicated by orange arrows, between  $t_1$  and  $t_2$ ) and sometimes occur unbound (protein indicated by the red arrow, gaining free energy between  $t_1$  and  $t_2$ ), because interaction energies are moderate with respect to  $k_B T$ . As compared to the classic image, this is a transition to a more dynamic view of clusters, where stable, binary elementary building blocks are replaced by a fluctuating network of temporary partners, evolving rapidly with time. This is in line with experimental data showing that individual proteins can enter and leave domains (13), as illustrated here (black arrows). Note that in this concept, interaction energies between neighbors are considered more as averages over short time periods. Theories as the one proposed in (12) are robust with respect to such a paradigmatic shift because they are only concerned with interactions averaged over time periods shorter than the time-scale of diffusion within a cluster (for comparison, a protein with a typical diffusion coefficient of  $1 \mu\text{m}^2 \text{s}^{-1}$  explores a domain of 200 nm diameter in a about 10 ms).

## SUPPORTING REFERENCES

1. Sieber, J. J., K. I. Willig, R. Heintzmann, S. W. Hell, and T. Lang. 2006. The SNARE motif is essential for the formation of syntaxin clusters in the plasma membrane. *Biophys. J.*, 90:2843–2851.
2. Flint, M., C. Maidens, L. D. Loomis-Price, C. Shotton, and J. Dubuisson et al. 1999. Characterization of hepatitis C virus E2 glycoprotein interaction with a putative cellular receptor, CD81. *J. Virol.*, 73:6235–6244.
3. Seigneuret, M. 2006. Complete Predicted Three-Dimensional Structure of the Facilitator Transmembrane Protein and Hepatitis C Virus Receptor CD81: Conserved and Variable Structural Domains in the Tetraspanin Superfamily. *Biophys. J.*, 90:212–227.
4. Poger, D. and Mark, A. E. 2010. On the Validation of Molecular Dynamics Simulations of Saturated and cis-Monounsaturated Phosphatidylcholine Lipid Bilayers: A Comparison with Experiment. *J. Chem. Theory Comput.*, 6:325–336.
5. Schmidt, T. H. and Kandt, C. 2012. LAMBADA and InflateGRO2: Efficient Membrane Alignment and Insertion of Membrane Proteins for Molecular Dynamics Simulations. *J. Chem. Inf. Model.*, 52:2657–2669.
6. Humphrey, W., Dalke, A. and Schulten, K. 1996. VMD: Visual Molecular Dynamics. *J. Mol. Graphics Modell.*, 14:33–38.
7. Frishman, D. and Argos, P. 1995. Knowledge-based protein secondary structure assignment. *Proteins: Struct., Funct., Bioinf.*, 23:566–579.
8. Mittelbrunn, M., M. Yáñez-Mó, D. Sancho, A. Ursa, and F. Sánchez-Madrid. 2002. Cutting edge: dynamic redistribution of tetraspanin CD81 at the central zone of the immune synapse in both T lymphocytes and APC. *J. Immunol.*, 169:6691–6695.
9. Schreiber, A., S. Fischer, and T. Lang. 2012. The Amyloid Precursor Protein Forms Plasmalemmal Clusters via Its Pathogenic Amyloid- $\beta$  Domain. *Biophys. J.*, 102:1411–1417.
10. Sieber, J. J., K. I. Willig, C. Kutzner, C. Gerding-Reimers, and B. Harke et al. 2007. Anatomy and dynamics of a supramolecular membrane protein cluster. *Science*, 317:1072–1076.
11. Weitz, S., and N. Destainville. 2013. Attractive asymmetric inclusions in elastic membranes under tension: cluster phases and membrane invaginations. *Soft Matter*, 9:7804.
12. Meilhac, N., and N. Destainville. 2011. Clusters of proteins in biomembranes: insights into the roles of interaction potential shapes and of protein diversity. *J Phys Chem B*, 115:7190–7199.



13. Espenel, C., E. Margeat, P. Dosset, C. Arduise, and C. Le Grimellec et al. 2008. Single-molecule analysis of CD9 dynamics and partitioning reveals multiple modes of interaction in the tetraspanin web. *J. Cell Biol.*, 182:765–776.
